# Supplementary material for: A metagenomic viral discovery approach identifies potential zoonotic and novel mammalian viruses in Neoromicia bats within South Africa
Source: PubMed Central journal article supplement (PMC5868816; doi:10.1371/journal.pone.0194527), 2018-03-26
Supplement: pone.0194527.s002.pdf [file pone.0194527.s002.pdf]

S1 Table: *Neoromicia* samples collected and pooled to investigate the South African *Neoromicia* virome

| Laboratory number | Museum number | Field Number  | Species confirmation         | Gender | Collection date | Site                                              | Province      | Coordinates |           | Available specimens |        |            |
|-------------------|---------------|---------------|------------------------------|--------|-----------------|---------------------------------------------------|---------------|-------------|-----------|---------------------|--------|------------|
|                   |               |               |                              |        |                 |                                                   |               | Y           | X         | Faecal              | Rectum | Intestines |
| UP 0161           | TM48032       | ECJS19/2007   | <i>Neoromicia capensis</i>   | M      | 12/14/2007      | Taung World Heritage Site                         | North West    | -27.61543   | 24.63005  | -                   | +      | -          |
| UP 0165           | TM48042       | ECJS36/2007   | <i>Neoromicia capensis</i>   | F      | 12/15/2007      | Taung World Heritage Site                         | North West    | -27.61543   | 24.63005  | -                   | +      | -          |
| UP 0166           | TM48046       | ECJS45/2007   | <i>Neoromicia capensis</i>   | F      | 12/15/2007      | Taung World Heritage Site                         | North West    | -27.61543   | 24.63005  | -                   | +      | -          |
| UP 0167           | TM48043       | ECJS38/2007   | <i>Neoromicia capensis</i>   | F      | 12/15/2007      | Taung World Heritage Site                         | North West    | -27.61543   | 24.63005  | -                   | +      | -          |
| UP 0168           | TM48044       | ECJS39/2007   | <i>Neoromicia capensis</i>   | F      | 12/15/2007      | Taung World Heritage Site                         | North West    | -27.61543   | 24.63005  | -                   | +      | -          |
| UP 0169           | TM48045       | ECJS42/2007   | <i>Neoromicia capensis</i>   | M      | 12/15/2007      | Taung World Heritage Site                         | North West    | -27.61543   | 24.63005  | -                   | +      | -          |
| UP 0204           | TM48028       | ECJS15/2007   | <i>Neoromicia capensis</i>   | M      | 2/12/2007       | Madikwe Game Reserve/ Kalkfontein Farm 111KP      | North West    | -24.79699   | 26.30092  | -                   | +      | -          |
| UP 0206           | TM48030       | ECJS17/2007   | <i>Neoromicia capensis</i>   | M      | 2/12/2007       | Madikwe Game Reserve/ Kalkfontein Farm 111KP      | North West    | -24.79699   | 26.30092  | +                   | +      | -          |
| UP 0207           | TM48031       | ECJS18/2007   | <i>Neoromicia capensis</i>   | M      | 2/12/2007       | Madikwe Game Reserve/ Kalkfontein Farm 111KP      | North West    | -24.79699   | 26.30092  | -                   | +      | -          |
| UP 1012           | TM48660       | 18            | <i>Neoromicia capensis</i>   | F      | 10/12/2010      | Kgaswane Nature Reserve/ Baviaanskrans Farm 308JQ | North West    | -25.73903   | 27.23011  | +                   | +      | +          |
| UP 1021           | TM48661       | 15            | <i>Neoromicia capensis</i>   | M      | 10/12/2010      | Kgaswane Nature Reserve/ Baviaanskrans Farm 308JQ | North West    | -25.73903   | 27.23011  | +                   | +      | +          |
| UP 0724           | TM48505       | ECJS-12/2010  | <i>Neoromicia nana</i>       | F      | 2/1/2010        | Pafuri, Kruger National Park                      | Limpopo       | -22.42151   | 31.2238   | -                   | -      | +          |
| UP 0725           | TM48506       | ECJS-13/2010  | <i>Neoromicia zuluensis</i>  | F      | 2/1/2010        | Pafuri, Kruger National Park                      | Limpopo       | -22.42151   | 31.2238   | +                   | +      | +          |
| UP 0727           | TM48508       | ECJS-17/2010  | <i>Neoromicia nana</i>       | F      | 2/1/2010        | Pafuri, Kruger National Park                      | Limpopo       | -22.42151   | 31.2238   | +                   | +      | +          |
| UP 0728           | TM48509       | ECJS-18/2010  | <i>Neoromicia nana</i>       | F      | 2/1/2010        | Pafuri, Kruger National Park                      | Limpopo       | -22.42151   | 31.2238   | +                   | +      | +          |
| UP 0760           | TM48533       | -             | <i>Neoromicia nana</i>       | M      | 2/3/2010        | Pafuri, Kruger National Park                      | Limpopo       | -22.34657   | 31.11595  | +                   | +      | -          |
| UP 0761           | TM48534       | -             | <i>Neoromicia nana</i>       | F      | 2/3/2010        | Pafuri, Kruger National Park                      | Limpopo       | -22.34657   | 31.11595  | -                   | +      | -          |
| UP 0762           | TM48535       | -             | <i>Neoromicia cf. helios</i> | M      | 2/3/2010        | Pafuri, Kruger National Park                      | Limpopo       | -22.34657   | 31.11595  | +                   | -      | +          |
| UP 0763           | TM48536       | -             | <i>Neoromicia cf. helios</i> | F      | 2/3/2010        | Pafuri, Kruger National Park                      | Limpopo       | -22.34657   | 31.11595  | +                   | -      | -          |
| UP 0764           | TM48537       | -             | <i>Neoromicia cf. helios</i> | F      | 2/3/2010        | Pafuri, Kruger National Park                      | Limpopo       | -22.34657   | 31.11595  | +                   | +      | +          |
| UP 0915           | TM48570       | 10            | <i>Neoromicia capensis</i>   | F      | 11/8/2010       | Pafuri, Kruger National Park                      | Limpopo       | -22.42151   | 31.2238   | +                   | +      | +          |
| UP 0918           | -             | 6             | <i>Neoromicia nana</i>       | F      | 11/8/2010       | Pafuri, Kruger National Park                      | Limpopo       | -22.42151   | 31.2238   | +                   | -      | -          |
| UP 0919           | -             | 7             | <i>Neoromicia nana</i>       | F      | 11/8/2010       | Pafuri, Kruger National Park                      | Limpopo       | -22.42151   | 31.2238   | +                   | -      | -          |
| UP 0920           | TM48571       | 1             | <i>Neoromicia nana</i>       | M      | 11/9/2010       | Pafuri, Kruger National Park                      | Limpopo       | -22.42151   | 31.2238   | -                   | +      | +          |
| UP 0921           | -             | 3             | <i>Neoromicia cf. helios</i> | F      | 11/9/2010       | Pafuri, Kruger National Park                      | Limpopo       | -22.42151   | 31.2238   | -                   | +      | +          |
| UP 0922           | TM48572       | 4             | <i>Neoromicia nana</i>       | M      | 11/9/2010       | Pafuri, Kruger National Park                      | Limpopo       | -22.42151   | 31.2238   | -                   | +      | +          |
| UP 0923           | TM48573       | 6             | <i>Neoromicia nana</i>       | M      | 11/9/2010       | Pafuri, Kruger National Park                      | Limpopo       | -22.42151   | 31.2238   | -                   | +      | -          |
| UP 0931           | TM48578       | 2B            | <i>Neoromicia cf. helios</i> | F      | 11/10/2010      | Pafuri, Kruger National Park                      | Limpopo       | -22.42601   | 31.29873  | -                   | +      | +          |
| UP 0952           | TM48587       | 7B            | <i>Neoromicia cf. helios</i> | F      | 11/12/2010      | Pafuri, Kruger National Park                      | Limpopo       | -22.34657   | 31.11595  | +                   | +      | +          |
| UP 0961           | TM48596       | 25A           | <i>Neoromicia zuluensis</i>  | F      | 11/12/2010      | Pafuri, Kruger National Park                      | Limpopo       | -22.34657   | 31.11595  | +                   | +      | +          |
| UP 0962           | TM48597       | 22A           | <i>Neoromicia nana</i>       | F      | 11/12/2010      | Pafuri, Kruger National Park                      | Limpopo       | -22.34657   | 31.11595  | +                   | +      | +          |
| UP 0963           | TM48598       | 18B           | <i>Neoromicia capensis</i>   | F      | 11/12/2010      | Pafuri, Kruger National Park                      | Limpopo       | -22.34657   | 31.11595  | +                   | +      | +          |
| UP 1787           | TM49186       | 37            | <i>Neoromicia capensis</i>   | M      | 1/19/2013       | Randstephne Farm 455KQ                            | Limpopo       | -24.59751   | 27.67145  | +                   | +      | +          |
| UP 1798           | -             | 1             | <i>Neoromicia zuluensis</i>  | M      | 1/21/2013       | Donkerpoort Farm 448KQ                            | Limpopo       | -24.59306   | 27.67956  | +                   | -      | -          |
| UP 1799           | -             | 2             | <i>Neoromicia capensis</i>   | M      | 1/21/2013       | Donkerpoort Farm 448KQ                            | Limpopo       | -24.59306   | 27.67956  | +                   | -      | -          |
| UP 1800           | -             | 3             | <i>Neoromicia capensis</i>   | M      | 1/21/2013       | Donkerpoort Farm 448KQ                            | Limpopo       | -24.59306   | 27.67956  | +                   | -      | -          |
| UP 3887           | TM49146       | -             | <i>Neoromicia nana</i>       | M      | 5/2/2014        | Mahune site, Gamafefe                             | Limpopo       | -24.61799   | 27.65235  | +                   | +      | +          |
| UP 3916           | TM49147       | -             | <i>Neoromicia zuluensis</i>  | F      | 5/2/2014        | Mahune site, Gamafefe                             | Limpopo       | -24.61799   | 27.65235  | +                   | +      | +          |
| UP 4965           | TM49188       | -             | <i>Neoromicia capensis</i>   | M      | 2/26/2015       | Randstephne Farm 455 KQ                           | Limpopo       | -24.59751   | 27.67145  | +                   | -      | -          |
| UP 4972           | TM49189       | -             | <i>Neoromicia capensis</i>   | F      | 2/28/2015       | Jonker Trust Farm/ Zandspruit 449KQ               | Limpopo       | -24.61737   | 27.68773  | +                   | -      | +          |
| UP 5013           | TM49069       | -             | <i>Neoromicia capensis</i>   | M      | 3/3/2015        | Jonker Trust Farm/ Zandspruit 449KQ               | Limpopo       | -24.625197  | 27.69787  | +                   | +      | +          |
| UP 5014           | TM49190       | -             | <i>Neoromicia capensis</i>   | F      | 3/3/2015        | Jonker Trust Farm/ Zandspruit 449KQ               | Limpopo       | -24.625197  | 27.69787  | +                   | +      | +          |
| UP 1369           | -             | -             | <i>Neoromicia capensis</i>   | M      | 9/24/2011       | Free Me rehab                                     | Gauteng       | -26.030063  | 28.040890 | -                   | +      | -          |
| UP 3921           | TM49169       | ECJS-09/2014  | <i>Neoromicia capensis</i>   | F      | 1/1/2014        | Telperion NR/ Sterkfontein Farm 495JR             | Mpumalanga    | -25.7113    | 29.01755  | -                   | +      | +          |
| UP 3922           | TM49170       | ECJS-10/2014  | <i>Neoromicia capensis</i>   | M      | 1/1/2014        | Telperion NR/ Sterkfontein Farm 495JR             | Mpumalanga    | -25.72596   | 28.99048  | -                   | +      | +          |
| UP 3923           | TM49171       | ECJS-11/2014  | <i>Neoromicia capensis</i>   | M      | 1/1/2014        | Telperion NR/ Sterkfontein Farm 495JR             | Mpumalanga    | -25.72596   | 28.99048  | -                   | +      | +          |
| UP 4813           | TM49191       | 2             | <i>Neoromicia capensis</i>   | F      | 1/24/2015       | Leeudraai Farm 221 JR                             | Gauteng       | -25.37081   | 28.56614  | +                   | +      | +          |
| UP 4814           | TM49192       | 6             | <i>Neoromicia capensis</i>   | F      | 1/24/2015       | Leeudraai Farm 221 JR                             | Gauteng       | -25.37081   | 28.56614  | +                   | +      | +          |
| UP 4815           | -             | 8             | <i>Neoromicia capensis</i>   | F      | 1/24/2015       | Leeudraai Farm 221 JR                             | Gauteng       | -25.37081   | 28.56614  | +                   | -      | -          |
| UP 4816           | TM49193       | 10            | <i>Neoromicia capensis</i>   | M      | 1/24/2015       | Leeudraai Farm 221 JR                             | Gauteng       | -25.37081   | 28.56614  | +                   | +      | +          |
| UP 4817           | -             | 1             | <i>Neoromicia capensis</i>   | M      | 1/24/2015       | Leeudraai Farm 221 JR                             | Gauteng       | -25.37081   | 28.56614  | +                   | -      | -          |
| UP 4819           | -             | 4             | <i>Neoromicia capensis</i>   | F      | 1/24/2015       | Leeudraai Farm 221 JR                             | Gauteng       | -25.37081   | 28.56614  | +                   | -      | -          |
| UP 4820           | -             | 5             | <i>Neoromicia capensis</i>   | M      | 1/24/2015       | Leeudraai Farm 221 JR                             | Gauteng       | -25.37081   | 28.56614  | +                   | -      | -          |
| UP 4823           | -             | 9             | <i>Neoromicia capensis</i>   | F      | 1/24/2015       | Leeudraai Farm 221 JR                             | Gauteng       | -25.37081   | 28.56614  | +                   | -      | -          |
| UP 4825           | -             | -             | <i>Neoromicia capensis</i>   | F      | 1/24/2015       | Leeudraai Farm 221 JR                             | Gauteng       | -25.37081   | 28.56614  | +                   | -      | -          |
| UP 5036           | TM49182       | ECJS-114/2015 | <i>Neoromicia capensis</i>   | M      | 4/20/2015       | Wakefield Farm 2369/ ptn 13                       | KwaZulu-Natal | -29.48694   | 29.89806  | +                   | +      | +          |
| UP 5038           | TM49183       | ECJS-116/2015 | <i>Neoromicia capensis</i>   | M      | 4/20/2015       | Wakefield Farm 2369/ ptn 13                       | KwaZulu-Natal | -29.48694   | 29.89806  | +                   | +      | +          |
| UP 5304           | TM49194       | -             | <i>Neoromicia capensis</i>   | F      | 2/5/2015        | Welgevonden Farm 969                              | KwaZulu-Natal | -29.331947  | 30.27753  | -                   | +      | +          |

Specimen material in bold indicate the sample type used for the Illumina sequencing
