# Supplementary material for: A metagenomic viral discovery approach identifies potential zoonotic and novel mammalian viruses in Neoromicia bats within South Africa
Source: PubMed Central journal article supplement (PMC5868816; doi:10.1371/journal.pone.0194527), 2018-03-26
Supplement: pone.0194527.s003.pdf [file pone.0194527.s003.pdf]

**S2 Table: CLC Genomics workbench bioinformatics workflow parameters**

**Step 1: Initial trimming parameters**

**Quality trimming**

|                 |      |
|-----------------|------|
| Ambiguous trim  | yes  |
| Ambiguous limit | 2    |
| Quality limit   | 0.05 |
| Quality Trim    | yes  |

| Sequence to Trim           | Strand | Action         | Mismatch | Gapcost | Cutoff | Sequence                                                                   |
|----------------------------|--------|----------------|----------|---------|--------|----------------------------------------------------------------------------|
| TruSeq-adapter-1           | Both   | Remove adapter | 2        | 3       | 10     | GGGGTAGTGGATCCTCCTAGGCCAGTTGGGTTATTCTAGAAGCAGATGTGTTGGCTGTTCTGAAACTCTGAAAA |
| TruSeq-adapter-3           | Both   | Remove adapter | 2        | 3       | 10     | CAACAGCCGGTCAAACATCTGGAGGGTAAGCCATAAACACCTCAACAGAAAA                       |
| PCR-primer-1               | Both   | Remove adapter | 2        | 3       | 10     | CGATAACTTCGTATAATGTATGCTATACGAAGTTATTACG                                   |
| PCR-primer-2               | Both   | Remove adapter | 2        | 3       | 10     | GCATAACTTCGTATAGCATAATTATACGAAGTTATTACGA                                   |
| Nextera-primer-adapter-1   | Both   | Remove adapter | 2        | 3       | 10     | GATCGGAAGAGCACACGTCTGAACTCCAGTCAC                                          |
| Nextera-primer-adapter-2   | Both   | Remove adapter | 2        | 3       | 10     | GATCGGAAGAGCGTCGTGTAGGGAAAGAGTGT                                           |
| Nextera-junction-adapter-1 | Both   | Remove adapter | 2        | 3       | 10     | CTGTCTTTATACACATCTAGATGTGTATAAGAGACAG                                      |
| SmartSeq-adapter-1         | Both   | Remove adapter | 2        | 3       | 10     | AATGATACGGCGACCACCGAGATCTACACTTCGCTACAGGACGCTGTTCCGTTCTATGGG               |
| SmartSeq-adapter-2         | Both   | Remove adapter | 2        | 3       | 10     | ACACTTCGCTACAGGACGCTGTTCCGTTCTATGGG                                        |
| SmartSeq-adapter-3         | Both   | Remove adapter | 2        | 3       | 10     | CAGACGTGTGCTCTCCGATCT                                                      |
| 5'PolyG                    | Plus   | Remove adapter | 2        | 3       | -      | G <sup>150</sup>                                                           |
| 3'PolyG                    | Minus  | Remove adapter | 2        | 3       | -      | C <sup>150</sup>                                                           |
| PCR-20mer                  | Plus   | Remove adapter | 2        | 3       | 10     | GACCATCTAGCGACCTCCCA                                                       |

**Filtering on length**

|                       |      |
|-----------------------|------|
| Max nr of nt in reads | 1000 |
| Min nr of nt in reads | 20   |
| Short reads discarded | yes  |

**Step 2: Map to host parameters**

Input host genomes/scaffolds downloaded from NCBI: *Myotis brandtii* assembly no. GCF\_00412655.1

|                              |              |
|------------------------------|--------------|
| Masking mode                 | no           |
| Mismatch cost                | 2            |
| Insertion cost               | 3            |
| Deletion cost                | 3            |
| Length fraction              | 0.7          |
| Similarity fraction          | 0.9          |
| Global alignment             | no           |
| Color error cost             | 3            |
| Auto detect paired distances | yes          |
| Non-specific match handling  | Map randomly |

**Outputs:**

|                |                    |
|----------------|--------------------|
| Report         | produced           |
| Read mapping   | Host NGS reads     |
| Unmapped reads | Non-host NGS reads |

**Remove PhiX sequencing control**

Same parameters as mapping to host

**Step 3: CLC de novo assembly**

**Map reads to contigs**

|                |                                  |
|----------------|----------------------------------|
| Mapping mode   | Map reads back to contigs (slow) |
| Update contigs | yes                              |

**Mapping options**

|                               |       |
|-------------------------------|-------|
| Mismatch cost                 | 2     |
| Insertion cost                | 3     |
| Deletion cost                 | 3     |
| Length fraction               | 0.5   |
| Similarity fraction           | 0.8   |
| Alignment mode                | local |
| Color space error cost        | 3     |
| Create list of unmapped reads | yes   |

**Graph parameters**

|                       |     |
|-----------------------|-----|
| Automatic bubble size | yes |
| Bubble size           | 50  |
| Automatic word size   | yes |
| Word size             | 20  |

**Contig length**

|                       |     |
|-----------------------|-----|
| minimum contig length | 200 |
|-----------------------|-----|

**Paired reads**

|                             |     |
|-----------------------------|-----|
| Perform scaffolding         | yes |
| Autodetect paired distances | yes |

**Outputs:**

|                       |                                              |
|-----------------------|----------------------------------------------|
| Report                | yes                                          |
| Assembly with Mapping | NGS contig output                            |
| Unmapped reads        | Left over reads not included in the assembly |
