# Supplementary material for: A metagenomic viral discovery approach identifies potential zoonotic and novel mammalian viruses in Neoromicia bats within South Africa
Source: PubMed Central journal article supplement (PMC5868816; doi:10.1371/journal.pone.0194527), 2018-03-26
Supplement: pone.0194527.s004.pdf [file pone.0194527.s004.pdf]

**S3 Table: *Neoromicia* virome samples available for molecular detection**

| Specimen             | Confirmation of species identification | Province | Feecal                      | Rectum        | Intestines |
|----------------------|----------------------------------------|----------|-----------------------------|---------------|------------|
| <b>North West</b>    |                                        |          |                             |               |            |
| 1                    | Pool                                   | UP 0204  | <i>Neoromicia capensis</i>  | North West    | - + -      |
|                      |                                        | UP 0206  | <i>Neoromicia capensis</i>  | North West    | - + -      |
|                      |                                        | UP 0207  | <i>Neoromicia capensis</i>  | North West    | - + -      |
| 2                    | Pool                                   | UP 1012  | <i>Neoromicia capensis</i>  | North West    | - - +      |
|                      |                                        | UP 1021  | <i>Neoromicia capensis</i>  | North West    | - - +      |
| <b>Gauteng</b>       |                                        |          |                             |               |            |
| 3                    | Not Pooled                             | UP 1369  | <i>Neoromicia capensis</i>  | Gauteng       | - + +      |
| 5                    | Pool                                   | UP 4813  | <i>Neoromicia capensis</i>  | Gauteng       | + - +      |
|                      |                                        | UP 4814  | <i>Neoromicia capensis</i>  | Gauteng       | - + -      |
|                      |                                        | UP 4816  | <i>Neoromicia capensis</i>  | Gauteng       | + - +      |
| <b>Mpumalanga</b>    |                                        |          |                             |               |            |
| 4                    | Pool                                   | UP 3921  | <i>Neoromicia capensis</i>  | Mpumalanga    | - + +      |
|                      |                                        | UP 3922  | <i>Neoromicia capensis</i>  | Mpumalanga    | - + +      |
|                      |                                        | UP 3923  | <i>Neoromicia capensis</i>  | Mpumalanga    | - + +      |
| <b>KwaZulu-Natal</b> |                                        |          |                             |               |            |
| 6                    | Pool                                   | UP 5036  | <i>Neoromicia capensis</i>  | KwaZulu-Natal | + - +      |
|                      |                                        | UP 5038  | <i>Neoromicia capensis</i>  | KwaZulu-Natal | + - +      |
|                      |                                        | UP 5304  | <i>Neoromicia capensis</i>  | KwaZulu-Natal | - + +      |
| <b>Limpopo</b>       |                                        |          |                             |               |            |
| 7                    | Not Pooled                             | UP 0725  | <i>Neoromicia zuluensis</i> | Limpopo       | - - +      |
| 8                    | Pool                                   | UP 0724  | <i>Neoromicia nana</i>      | Limpopo       | - - +      |
|                      |                                        | UP 0727  | <i>Neoromicia nana</i>      | Limpopo       | + - +      |
|                      |                                        | UP 0728  | <i>Neoromicia nana</i>      | Limpopo       | + - +      |
|                      |                                        | UP 0760  | <i>Neoromicia nana</i>      | Limpopo       | + + -      |
| 9                    | Pool                                   | UP 0761  | <i>Neoromicia nana</i>      | Limpopo       | - + -      |
|                      |                                        | UP 0762  | <i>Neoromicia helios</i>    | Limpopo       | + - +      |
|                      |                                        | UP 0763  | <i>Neoromicia helios</i>    | Limpopo       | + - -      |
|                      |                                        | UP 0764  | <i>Neoromicia helios</i>    | Limpopo       | + - +      |
| 11                   | Not Pooled                             | UP 0915  | <i>Neoromicia capensis</i>  | Limpopo       | + - +      |
|                      |                                        | UP 0920  | <i>Neoromicia nana</i>      | Limpopo       | - - +      |
|                      |                                        | UP 0922  | <i>Neoromicia nana</i>      | Limpopo       | - + +      |
| 12                   | Pool                                   | UP 0923  | <i>Neoromicia nana</i>      | Limpopo       | - + -      |
|                      |                                        | UP 0921  | <i>Neoromicia helios</i>    | Limpopo       | - - +      |
|                      |                                        | UP 0931  | <i>Neoromicia helios</i>    | Limpopo       | - + +      |
| 13                   | Pool                                   | UP 0952  | <i>Neoromicia helios</i>    | Limpopo       | - - +      |
|                      |                                        | UP 0961  | <i>Neoromicia zuluensis</i> | Limpopo       | + - +      |
|                      |                                        | UP 0963  | <i>Neoromicia capensis</i>  | Limpopo       | + - +      |
| 14                   | Pool                                   | UP 0962  | <i>Neoromicia nana</i>      | Limpopo       | - - +      |
|                      |                                        | UP 1787  | <i>Neoromicia capensis</i>  | Limpopo       | - - +      |
|                      |                                        | UP 3887  | <i>Neoromicia nana</i>      | Limpopo       | - - +      |
| 16                   | Not Pooled                             | UP 1787  | <i>Neoromicia capensis</i>  | Limpopo       | - - +      |
|                      |                                        | UP 3887  | <i>Neoromicia nana</i>      | Limpopo       | - - +      |
| 17                   | Pool                                   | UP 3916  | <i>Neoromicia zuluensis</i> | Limpopo       | + - +      |
|                      |                                        | UP 4965  | <i>Neoromicia capensis</i>  | Limpopo       | + - -      |
| 18                   | Pool                                   | UP 4972  | <i>Neoromicia capensis</i>  | Limpopo       | - - +      |
|                      |                                        | UP 5013  | <i>Neoromicia capensis</i>  | Limpopo       | + - +      |
| 19                   | Pool                                   | UP 5014  | <i>Neoromicia capensis</i>  | Limpopo       | + - +      |

Specimen material in bold indicates availability of remaining homogenates previously utilized for Illumina sequencing.
