# Supplementary material for: A metagenomic viral discovery approach identifies potential zoonotic and novel mammalian viruses in Neoromicia bats within South Africa
Source: PubMed Central journal article supplement (PMC5868816; doi:10.1371/journal.pone.0194527), 2018-03-26
Supplement: pone.0194527.s005.pdf [file pone.0194527.s005.pdf]

---

**S4 Table: *Alpha-* and *Betacoronavirus* heminested RT-PCR primers**

| <b>First round primers</b>  | <b>5'-3' Sequence</b>      | <b>Amplicon size</b> |
|-----------------------------|----------------------------|----------------------|
| <b>P1Alpha/Beta_For2016</b> | ATGGGHTGGGAYTAYCCHAARTGYGA |                      |
| <b>P1Alpha_Rev2016</b>      | CCRTCATCWGAIARDATCATCAT    | 442-443bp            |
| <b>P1Beta_Rev2016</b>       | CATCRTCASDIARDATCATCAT     |                      |
| <b>Nested PCR primers</b>   |                            |                      |
| <b>P2ALPHA_For2016</b>      | TYTAYNTNAARCCWGGTGG        |                      |
| <b>P2BETA_For2016</b>       | TAYGTIAARCCWGGHGGIAC       | 266-268bp            |
