# Supplementary material for: A metagenomic viral discovery approach identifies potential zoonotic and novel mammalian viruses in Neoromicia bats within South Africa
Source: PubMed Central journal article supplement (PMC5868816; doi:10.1371/journal.pone.0194527), 2018-03-26
Supplement: pone.0194527.s006.pdf [file pone.0194527.s006.pdf]

**S5 Table: Pairwise similarities inferred from distance estimations of full length genomes of the *Circoviridae* family**

| Accession  | Circoviruses as comparison   | 1    | 2     | 3     | 4     | 5     | 6     | 7     | 8     | 9     | 10    | 11    | 12    | 13    | 14    | 15    | 16    | 17    | 18    | 19    | 20    | 21    | 22    | 23    | 24    | 25    | 26    | 27    | 28    | 29    | 30    | 31    | 32    | Genera |       |
|------------|------------------------------|------|-------|-------|-------|-------|-------|-------|-------|-------|-------|-------|-------|-------|-------|-------|-------|-------|-------|-------|-------|-------|-------|-------|-------|-------|-------|-------|-------|-------|-------|-------|-------|--------|-------|
| this study | NeoCycloV-1 (19681/RSA)      |      | 0.013 | 0.013 | 0.013 | 0.013 | 0.013 | 0.013 | 0.014 | 0.013 | 0.013 | 0.013 | 0.012 | 0.012 | 0.013 | 0.012 | 0.013 | 0.013 | 0.013 | 0.014 | 0.013 | 0.012 | 0.014 | 0.013 | 0.013 | 0.013 | 0.013 | 0.012 | 0.011 | 0.013 | 0.012 | 0.012 |       |        |       |
| GQ4048455  | CyclovirusPK5034             | 64.9 |       | 0.014 | 0.013 | 0.013 | 0.013 | 0.013 | 0.014 | 0.012 | 0.013 | 0.013 | 0.012 | 0.013 | 0.012 | 0.013 | 0.013 | 0.013 | 0.013 | 0.014 | 0.013 | 0.013 | 0.012 | 0.013 | 0.014 | 0.014 | 0.013 | 0.014 | 0.012 | 0.013 | 0.012 | 0.013 | 0.012 | 0.013  |       |
| GQ404846   | CyclovirusPK5222             | 60.5 | 58.3  |       | 0.012 | 0.013 | 0.014 | 0.013 | 0.012 | 0.012 | 0.013 | 0.013 | 0.013 | 0.013 | 0.014 | 0.012 | 0.013 | 0.013 | 0.013 | 0.013 | 0.014 | 0.012 | 0.012 | 0.013 | 0.012 | 0.012 | 0.013 | 0.013 | 0.013 | 0.012 | 0.014 | 0.013 | 0.013 |        |       |
| KJ641712   | BitCV_BtRp-CV-3/GD2012       | 59.8 | 57.8  | 57.6  |       | 0.013 | 0.013 | 0.012 | 0.013 | 0.012 | 0.012 | 0.013 | 0.013 | 0.012 | 0.013 | 0.012 | 0.013 | 0.013 | 0.013 | 0.013 | 0.013 | 0.013 | 0.012 | 0.014 | 0.013 | 0.014 | 0.012 | 0.013 | 0.013 | 0.013 | 0.013 | 0.012 | 0.013 |        |       |
| HQ738637   | BitCV/USA/2009-TB            | 58.8 | 57.9  | 56.6  | 55.4  |       | 0.013 | 0.014 | 0.012 | 0.013 | 0.014 | 0.013 | 0.012 | 0.012 | 0.013 | 0.012 | 0.014 | 0.013 | 0.014 | 0.013 | 0.014 | 0.013 | 0.014 | 0.013 | 0.014 | 0.013 | 0.014 | 0.012 | 0.013 | 0.012 | 0.012 | 0.012 | 0.012 |        |       |
| KM382270   | BitCVPOA/2012/II             | 58.7 | 57.6  | 58.2  | 57.9  | 55.5  |       | 0.013 | 0.014 | 0.013 | 0.014 | 0.013 | 0.014 | 0.013 | 0.013 | 0.013 | 0.013 | 0.013 | 0.013 | 0.013 | 0.013 | 0.013 | 0.012 | 0.013 | 0.012 | 0.014 | 0.014 | 0.012 | 0.013 | 0.013 | 0.013 | 0.013 | 0.014 |        |       |
| KM382270   | BitCVPOA/2012/VI             | 56.2 | 59.5  | 54.4  | 57.9  | 56.2  | 56.5  |       | 0.013 | 0.013 | 0.013 | 0.013 | 0.012 | 0.012 | 0.013 | 0.013 | 0.014 | 0.012 | 0.013 | 0.013 | 0.014 | 0.012 | 0.013 | 0.013 | 0.012 | 0.013 | 0.013 | 0.013 | 0.012 | 0.012 | 0.013 | 0.012 | 0.012 |        |       |
| NC_014928  | CyVPKgoat111/PAK/2009        | 58.9 | 55.9  | 65.7  | 54.2  | 56.7  | 58.0  | 52.8  |       | 0.013 | 0.013 | 0.013 | 0.013 | 0.014 | 0.013 | 0.013 | 0.014 | 0.013 | 0.014 | 0.013 | 0.014 | 0.013 | 0.014 | 0.013 | 0.014 | 0.013 | 0.013 | 0.013 | 0.012 | 0.012 | 0.012 | 0.012 | 0.014 |        |       |
| KC512920   | DfCyV-8_AU-DFB007B-2010      | 54.8 | 56.1  | 58.2  | 56.3  | 53.4  | 57.2  | 62.8  | 55.6  |       | 0.013 | 0.012 | 0.014 | 0.013 | 0.012 | 0.013 | 0.013 | 0.012 | 0.013 | 0.014 | 0.013 | 0.014 | 0.013 | 0.012 | 0.013 | 0.013 | 0.013 | 0.012 | 0.012 | 0.013 | 0.014 | 0.013 | 0.013 |        |       |
| KC512918   | DfCyV-6_US-DFKWGX-2012       | 57.4 | 55.0  | 55.7  | 53.0  | 53.7  | 57.1  | 56.9  | 55.0  | 55.0  |       | 0.014 | 0.013 | 0.012 | 0.013 | 0.012 | 0.014 | 0.013 | 0.012 | 0.013 | 0.013 | 0.013 | 0.013 | 0.012 | 0.013 | 0.013 | 0.012 | 0.012 | 0.013 | 0.012 | 0.012 | 0.013 |       |        |       |
| KF031470   | HumanCVVN_ps1                | 44.2 | 43.8  | 44.6  | 44.4  | 44.6  | 45.6  | 44.8  | 43.7  | 44.9  | 46.9  |       | 0.013 | 0.013 | 0.013 | 0.013 | 0.013 | 0.013 | 0.013 | 0.013 | 0.013 | 0.013 | 0.013 | 0.012 | 0.013 | 0.013 | 0.012 | 0.012 | 0.013 | 0.013 | 0.012 |       |       |        |       |
| NC_014930  | CyV_NGchicken15/NGA/2009     | 58.6 | 56.9  | 59.5  | 55.9  | 56.0  | 55.2  | 53.3  | 58.7  | 54.3  | 54.2  | 43.9  |       | 0.012 | 0.013 | 0.014 | 0.013 | 0.013 | 0.013 | 0.012 | 0.013 | 0.013 | 0.013 | 0.013 | 0.013 | 0.013 | 0.012 | 0.012 | 0.013 | 0.012 | 0.012 |       |       |        |       |
| GQ404849   | CyVChimp11                   | 58.6 | 57.5  | 60.9  | 56.1  | 59.1  | 55.4  | 54.5  | 60.3  | 57.0  | 54.1  | 42.7  | 63.9  |       | 0.014 | 0.013 | 0.013 | 0.013 | 0.012 | 0.014 | 0.013 | 0.012 | 0.013 | 0.013 | 0.012 | 0.012 | 0.012 | 0.012 | 0.012 | 0.012 | 0.012 | 0.012 |       |        |       |
| NC_014927  | CyVPKgoat21/PAK/2009         | 47.5 | 46.0  | 47.4  | 47.0  | 46.2  | 46.4  | 47.0  | 45.2  | 45.7  | 49.5  | 65.6  | 45.6  | 45.8  |       | 0.013 | 0.012 | 0.014 | 0.013 | 0.014 | 0.013 | 0.014 | 0.012 | 0.012 | 0.013 | 0.012 | 0.012 | 0.012 | 0.012 | 0.012 | 0.012 | 0.012 |       |        |       |
| JF938080   | BitCVZS/China/2011YN-BitCV-3 | 56.3 | 55.8  | 58.3  | 56.3  | 52.7  | 57.8  | 57.6  | 57.2  | 58.3  | 68.1  | 45.6  | 55.8  | 56.2  | 48.0  |       | 0.013 | 0.013 | 0.013 | 0.014 | 0.012 | 0.012 | 0.013 | 0.013 | 0.012 | 0.013 | 0.013 | 0.012 | 0.012 | 0.012 | 0.012 | 0.012 | 0.012 |        |       |
| JF938081   | BitCVZS/China/2011YN-BitCV-4 | 56.1 | 60.2  | 61.1  | 57.7  | 60.0  | 56.0  | 57.1  | 58.6  | 55.3  | 54.0  | 43.7  | 60.6  | 62.1  | 45.8  | 56.5  |       | 0.013 | 0.013 | 0.014 | 0.013 | 0.013 | 0.013 | 0.013 | 0.013 | 0.012 | 0.012 | 0.012 | 0.012 | 0.012 | 0.013 | 0.013 |       |        |       |
| KJ641717   | BitCVBtIsp-CV/GD2012         | 54.5 | 55.1  | 55.2  | 54.6  | 52.9  | 60.4  | 54.6  | 54.1  | 53.9  | 53.6  | 45.1  | 54.2  | 52.2  | 45.7  | 55.7  | 53.9  |       | 0.014 | 0.013 | 0.012 | 0.013 | 0.014 | 0.013 | 0.013 | 0.012 | 0.012 | 0.012 | 0.012 | 0.012 | 0.012 | 0.012 |       |        |       |
| KJ641734   | BitCVBtVS-CV/SC2013          | 54.4 | 54.2  | 53.8  | 56.3  | 53.9  | 57.0  | 63.7  | 53.0  | 59.7  | 55.9  | 46.0  | 54.0  | 55.0  | 46.6  | 56.3  | 55.8  | 53.6  |       | 0.013 | 0.012 | 0.013 | 0.007 | 0.013 | 0.014 | 0.012 | 0.013 | 0.013 | 0.013 | 0.012 | 0.014 | 0.012 | 0.012 |        |       |
| KJ641728   | BitCVBtPa-CV-2/NX2013        | 53.3 | 53.5  | 55.4  | 52.6  | 50.3  | 54.3  | 54.7  | 54.1  | 55.9  | 59.5  | 44.4  | 51.9  | 51.8  | 46.2  | 58.1  | 53.3  | 52.4  | 55.1  |       | 0.013 | 0.012 | 0.014 | 0.013 | 0.014 | 0.012 | 0.012 | 0.013 | 0.013 | 0.011 | 0.012 | 0.012 | 0.012 |        |       |
| KJ641720   | BitCVBtTp-CV-2/GX2012        | 54.0 | 55.4  | 55.4  | 54.6  | 53.8  | 56.6  | 65.2  | 53.6  | 61.0  | 59.0  | 44.8  | 53.9  | 54.0  | 45.6  | 57.4  | 57.9  | 51.8  | 67.3  | 55.8  |       | 0.013 | 0.013 | 0.013 | 0.013 | 0.013 | 0.013 | 0.013 | 0.012 | 0.012 | 0.012 | 0.012 | 0.012 | 0.012  | 0.012 |
| JF938079   | BitCVZS/China/2011YN-BitCV-2 | 57.4 | 57.0  | 59.0  | 56.7  | 58.5  | 57.3  | 56.4  | 57.9  | 54.6  | 54.9  | 43.2  | 59.7  | 59.3  | 47.6  | 56.3  | 61.5  | 54.4  | 55.8  | 52.7  | 58.0  |       | 0.013 | 0.013 | 0.012 | 0.013 | 0.013 | 0.013 | 0.013 | 0.012 | 0.012 | 0.013 | 0.013 | 0.011  |       |
| KJ641715   | BitCVBtRp-CV-52/GD2012       | 54.6 | 54.3  | 54.2  | 55.9  | 53.7  | 56.9  | 63.4  | 54.0  | 60.0  | 56.7  | 45.9  | 54.3  | 55.1  | 46.7  | 56.2  | 56.1  | 54.1  | 93.7  | 55.0  | 67.2  | 55.3  |       | 0.013 | 0.014 | 0.012 | 0.013 | 0.013 | 0.013 | 0.012 | 0.014 | 0.012 | 0.013 |        |       |
| NC_021206  | BitCVXOR7                    | 38.1 | 40.2  | 37.2  | 36.1  | 38.2  | 38.7  | 38.0  | 36.7  | 37.9  | 38.8  | 36.6  | 37.3  | 37.7  | 36.9  | 37.3  | 37.2  | 39.6  | 38.1  | 35.4  | 38.9  | 38.4  | 37.4  |       | 0.013 | 0.013 | 0.014 | 0.012 | 0.013 | 0.013 | 0.014 | 0.012 | 0.012 | 0.012  |       |
| NC_001792  | PorcineCV1                   | 40.8 | 40.5  | 39.0  | 38.6  | 40.9  | 40.7  | 38.1  | 39.9  | 37.4  | 39.1  | 37.7  | 39.6  | 38.9  | 36.7  | 38.3  | 37.9  | 39.1  | 37.8  | 36.9  | 39.3  | 39.0  | 37.6  |       | 66.1  |       | 0.012 | 0.014 | 0.013 | 0.012 | 0.013 | 0.013 | 0.012 | 0.012  |       |
| NC_002361  | ColumbidCV                   | 39.2 | 41.3  | 38.5  | 37.5  | 38.0  | 40.1  | 38.3  | 38.7  | 37.4  | 39.2  | 37.0  | 37.8  | 39.0  | 36.2  | 39.7  | 39.4  | 38.7  | 39.0  | 39.2  | 37.5  | 39.7  | 39.0  |       | 44.1  | 43.6  |       | 0.013 | 0.013 | 0.013 | 0.012 | 0.012 | 0.012 | 0.012  |       |
| NC_003410  | CanaryCV                     | 38.8 | 40.6  | 38.0  | 38.7  | 38.9  | 39.0  | 38.2  | 39.1  | 36.5  | 38.1  | 36.3  | 38.4  | 36.5  | 36.3  | 39.3  | 38.1  | 39.2  | 39.0  | 38.1  | 39.2  | 39.0  | 38.7  |       | 43.9  | 43.7  | 59.3  |       | 0.012 | 0.014 | 0.013 | 0.013 | 0.012 | 0.012  |       |
| NC_008522  | FinchCV                      | 38.4 | 38.6  | 38.6  | 38.8  | 39.5  | 38.8  | 38.2  | 39.3  | 36.2  | 38.8  | 35.8  | 38.3  | 37.1  | 35.8  | 38.4  | 37.8  | 38.6  | 38.8  | 38.3  | 39.2  | 38.6  | 39.4  |       | 45.0  | 45.4  | 60.5  | 66.3  |       | 0.013 | 0.013 | 0.013 | 0.013 | 0.011  |       |
| NC_001944  | Beak & feather disease virus | 37.7 | 38.5  | 38.8  | 37.7  | 38.3  | 39.6  | 38.3  | 38.9  | 36.9  | 39.2  | 35.0  | 37.9  | 37.1  | 35.3  | 38.0  | 37.0  | 39.3  | 41.4  | 39.5  | 39.7  | 40.9  | 41.3  |       | 44.3  | 42.8  | 59.8  | 54.9  | 56.1  |       | 0.013 | 0.013 | 0.013 | 0.013  |       |
| JX863737   | BitCVXOR                     | 41.6 | 41.3  | 39.7  | 40.9  | 40.5  | 41.8  | 41.2  | 40.3  | 39.9  | 42.7  | 38.4  | 41.6  | 41.2  | 38.7  | 41.0  | 38.9  | 40.2  | 41.4  | 42.0  | 41.0  | 41.4  | 40.9  |       | 42.1  | 44.3  | 41.7  | 42.6  | 42.5  | 42.3  |       | 0.013 | 0.012 | 0.013  |       |
| JQ814849   | BitCVRh.ferrumequinumCV1     | 39.6 | 40.0  | 38.0  | 37.6  | 38.7  | 40.7  | 40.3  | 39.2  | 38.5  | 40.8  | 36.9  | 38.1  | 37.9  | 34.8  | 39.0  | 39.0  | 37.9  | 40.7  | 39.0  | 40.2  | 40.8  | 40.4  |       | 41.3  | 43.2  | 41.3  | 42.6  | 41.0  | 43.2  | 44.3  |       | 0.011 | 0.012  |       |
| JF938078   | BitCVZS/China/2011YN-BitCV-1 | 36.4 | 35.9  | 35.2  | 33.4  | 35.8  | 36.7  | 35.5  | 35.1  | 35.4  | 39.1  | 34.6  | 35.8  | 35.3  | 35.5  | 35.7  | 34.8  | 32.0  | 34.4  | 36.3  | 34.6  | 34.7  | 34.8  |       | 33.6  | 32.9  | 33.3  | 33.1  | 32.6  | 32.3  | 34.8  | 32.9  |       | 0.012  |       |
| KM382272   | BitCVPOA/2012/IV             | 34.7 | 32.6  | 32.9  | 35.3  | 35.4  | 35.6  | 32.6  | 32.7  | 34.3  | 32.8  | 32.7  | 32.3  | 32.3  | 33.4  | 34.1  | 32.3  | 32.9  | 32.9  | 33.1  | 32.7  | 35.1  | 33.4  |       | 29.2  | 29.1  | 29.9  | 29.6  | 29.1  | 29.2  | 31.0  | 31.8  | 29.4  |        |       |
