# Supplementary material for: A metagenomic viral discovery approach identifies potential zoonotic and novel mammalian viruses in Neoromicia bats within South Africa
Source: PubMed Central journal article supplement (PMC5868816; doi:10.1371/journal.pone.0194527), 2018-03-26
Supplement: pone.0194527.s007.pdf [file pone.0194527.s007.pdf]

S6 Table: Pairwise similarities inferred from distance estimations of an L gene region between selected *Bunyavirales*

| Accession | Members of the order as comparison | 1                                   | 2     | 3     | 4     | 5     | 6     | 7     | 8     | 9     | 10    | 11    | 12    | 13    | 14    | 15    | 16    | 17    | 18    | 19    | 20    | 21    | 22    | 23    | 24    | 25    | 26    | 27    | 28    | 29    | 30    | 31    |       |
|-----------|------------------------------------|-------------------------------------|-------|-------|-------|-------|-------|-------|-------|-------|-------|-------|-------|-------|-------|-------|-------|-------|-------|-------|-------|-------|-------|-------|-------|-------|-------|-------|-------|-------|-------|-------|-------|
| 1         | this study                         | NB/PhenuiV/Neo11304/RSA             | 0.027 | 0.027 | 0.027 | 0.027 | 0.027 | 0.027 | 0.027 | 0.027 | 0.027 | 0.027 | 0.027 | 0.027 | 0.027 | 0.027 | 0.029 | 0.030 | 0.031 | 0.032 | 0.031 | 0.031 | 0.032 | 0.031 | 0.031 | 0.032 | 0.032 | 0.030 | 0.031 | 0.030 | 0.030 | 0.030 |       |
| 2         | KX886767                           | Bat/VNM/16715_38                    | 68.7  | 0.004 | 0.004 | 0.004 | 0.004 | 0.005 | 0.006 | 0.006 | 0.008 | 0.008 | 0.008 | 0.008 | 0.006 | 0.006 | 0.028 | 0.029 | 0.030 | 0.031 | 0.030 | 0.030 | 0.030 | 0.030 | 0.030 | 0.032 | 0.032 | 0.031 | 0.030 | 0.030 | 0.029 | 0.030 |       |
| 3         | KX886785                           | Bat/VNM/16845_8                     | 68.3  | 99.6  | 0.000 | 0.000 | 0.000 | 0.004 | 0.004 | 0.004 | 0.007 | 0.008 | 0.007 | 0.007 | 0.004 | 0.004 | 0.028 | 0.029 | 0.030 | 0.031 | 0.030 | 0.030 | 0.031 | 0.030 | 0.030 | 0.032 | 0.032 | 0.031 | 0.030 | 0.030 | 0.029 | 0.030 |       |
| 4         | KX886779                           | Bat/VNM/16715_84                    | 68.3  | 99.6  | 100.0 | 0.000 | 0.000 | 0.004 | 0.004 | 0.004 | 0.007 | 0.008 | 0.007 | 0.007 | 0.004 | 0.004 | 0.028 | 0.029 | 0.030 | 0.031 | 0.030 | 0.030 | 0.031 | 0.030 | 0.030 | 0.032 | 0.032 | 0.031 | 0.030 | 0.030 | 0.029 | 0.030 |       |
| 5         | KX886775                           | Bat/VNM/16715_70                    | 68.3  | 99.6  | 100.0 | 100.0 | 0.000 | 0.004 | 0.004 | 0.004 | 0.007 | 0.008 | 0.007 | 0.007 | 0.004 | 0.004 | 0.028 | 0.029 | 0.030 | 0.031 | 0.030 | 0.030 | 0.031 | 0.030 | 0.030 | 0.032 | 0.032 | 0.031 | 0.030 | 0.030 | 0.029 | 0.030 |       |
| 6         | KX886769                           | Bat/VNM/16715_45                    | 68.3  | 99.6  | 100.0 | 100.0 | 100.0 | 0.004 | 0.004 | 0.004 | 0.007 | 0.008 | 0.007 | 0.007 | 0.004 | 0.004 | 0.028 | 0.029 | 0.030 | 0.031 | 0.030 | 0.030 | 0.031 | 0.030 | 0.030 | 0.032 | 0.032 | 0.031 | 0.030 | 0.030 | 0.029 | 0.030 |       |
| 7         | KX886761                           | Bat/VNM/16715_14                    | 68.3  | 99.2  | 99.6  | 99.6  | 99.6  | 99.6  | 0.005 | 0.006 | 0.008 | 0.009 | 0.008 | 0.008 | 0.005 | 0.005 | 0.028 | 0.029 | 0.030 | 0.031 | 0.030 | 0.030 | 0.031 | 0.030 | 0.030 | 0.032 | 0.032 | 0.031 | 0.030 | 0.030 | 0.029 | 0.030 |       |
| 8         | KX886759                           | Bat/VNM/16715_13                    | 67.9  | 99.2  | 99.6  | 99.6  | 99.6  | 99.2  | 0.005 | 0.008 | 0.009 | 0.008 | 0.008 | 0.006 | 0.006 | 0.028 | 0.029 | 0.030 | 0.031 | 0.030 | 0.030 | 0.031 | 0.030 | 0.030 | 0.031 | 0.031 | 0.032 | 0.032 | 0.031 | 0.031 | 0.030 | 0.028 | 0.029 |
| 9         | KX886783                           | Bat/VNM/16715_88                    | 67.9  | 99.2  | 99.6  | 99.6  | 99.6  | 99.2  | 99.2  | 0.008 | 0.009 | 0.008 | 0.008 | 0.005 | 0.005 | 0.028 | 0.029 | 0.030 | 0.031 | 0.030 | 0.030 | 0.031 | 0.030 | 0.030 | 0.031 | 0.030 | 0.032 | 0.032 | 0.031 | 0.030 | 0.030 | 0.029 | 0.030 |
| 10        | KX886781                           | Bat/VNM/16715_86                    | 67.9  | 98.4  | 98.8  | 98.8  | 98.8  | 98.4  | 98.4  | 98.4  | 0.004 | 0.000 | 0.000 | 0.008 | 0.008 | 0.028 | 0.029 | 0.030 | 0.031 | 0.030 | 0.030 | 0.031 | 0.030 | 0.030 | 0.032 | 0.032 | 0.031 | 0.030 | 0.030 | 0.029 | 0.029 |       |       |
| 11        | KX886777                           | Bat/VNM/16715_77                    | 68.3  | 98.0  | 98.4  | 98.4  | 98.4  | 98.0  | 98.0  | 99.6  | 0.004 | 0.004 | 0.008 | 0.008 | 0.028 | 0.029 | 0.030 | 0.031 | 0.030 | 0.030 | 0.031 | 0.030 | 0.030 | 0.032 | 0.032 | 0.031 | 0.030 | 0.030 | 0.029 | 0.029 |       |       |       |
| 12        | KX886773                           | Bat/VNM/16715_53                    | 67.9  | 98.4  | 98.8  | 98.8  | 98.8  | 98.4  | 98.4  | 98.4  | 100.0 | 99.6  | 0.000 | 0.008 | 0.008 | 0.028 | 0.029 | 0.030 | 0.031 | 0.030 | 0.030 | 0.031 | 0.030 | 0.030 | 0.032 | 0.032 | 0.031 | 0.030 | 0.030 | 0.029 | 0.029 |       |       |
| 13        | KX886765                           | Bat/VNM/16715_23                    | 67.9  | 98.4  | 98.8  | 98.8  | 98.8  | 98.4  | 98.4  | 98.4  | 100.0 | 99.6  | 100.0 | 0.008 | 0.008 | 0.028 | 0.029 | 0.030 | 0.031 | 0.030 | 0.030 | 0.031 | 0.030 | 0.030 | 0.032 | 0.032 | 0.031 | 0.030 | 0.030 | 0.029 | 0.029 |       |       |
| 14        | KX886763                           | Bat/VNM/16715_22                    | 67.9  | 99.2  | 99.6  | 99.6  | 99.6  | 99.2  | 99.2  | 99.2  | 98.4  | 98.0  | 98.4  | 98.4  | 0.000 | 0.028 | 0.029 | 0.030 | 0.031 | 0.030 | 0.030 | 0.031 | 0.030 | 0.030 | 0.032 | 0.032 | 0.031 | 0.030 | 0.030 | 0.029 | 0.030 |       |       |
| 15        | KX886771                           | Bat/VNM/16715_5                     | 67.9  | 99.2  | 99.6  | 99.6  | 99.6  | 99.2  | 99.2  | 98.4  | 98.0  | 98.4  | 98.4  | 100.0 | 0.028 | 0.029 | 0.030 | 0.031 | 0.030 | 0.030 | 0.031 | 0.030 | 0.030 | 0.031 | 0.030 | 0.032 | 0.032 | 0.031 | 0.030 | 0.030 | 0.029 | 0.030 |       |
| 16        | KC154063                           | Bat/Rh. pearsoni/Shanxi/2011        | 63.5  | 70.3  | 69.9  | 69.9  | 69.9  | 69.9  | 70.3  | 69.5  | 69.5  | 69.1  | 69.5  | 69.5  | 70.3  | 70.3  | 0.030 | 0.030 | 0.030 | 0.031 | 0.031 | 0.031 | 0.030 | 0.030 | 0.030 | 0.031 | 0.030 | 0.030 | 0.030 | 0.029 | 0.030 |       |       |
| 17        | KM817705                           | Zhee Mosquito virus XC1_8           | 61.0  | 61.4  | 61.8  | 61.8  | 61.8  | 61.4  | 62.2  | 61.4  | 61.4  | 61.8  | 61.4  | 61.4  | 61.4  | 61.4  | 60.6  | 0.030 | 0.030 | 0.030 | 0.030 | 0.031 | 0.029 | 0.029 | 0.030 | 0.031 | 0.030 | 0.029 | 0.030 | 0.029 | 0.030 |       |       |
| 18        | NC_018463                          | Shamonda virus                      | 38.2  | 43.4  | 43.4  | 43.4  | 43.4  | 43.4  | 43.8  | 43.4  | 43.8  | 43.8  | 43.8  | 43.8  | 43.4  | 43.4  | 38.2  | 37.3  | 0.027 | 0.028 | 0.027 | 0.029 | 0.029 | 0.029 | 0.030 | 0.030 | 0.030 | 0.029 | 0.029 | 0.030 | 0.030 |       |       |
| 19        | KP691606                           | Oropouche virus BeH759021           | 39.8  | 43.4  | 43.0  | 43.0  | 43.0  | 43.0  | 43.0  | 43.4  | 43.4  | 41.8  | 41.4  | 41.8  | 41.8  | 43.4  | 43.4  | 43.0  | 37.8  | 73.5  | 0.027 | 0.027 | 0.028 | 0.029 | 0.029 | 0.031 | 0.031 | 0.030 | 0.029 | 0.030 | 0.030 | 0.030 |       |
| 20        | KP063898                           | Bunyamwera virus SFAbCrEq238        | 41.8  | 41.8  | 42.2  | 42.2  | 42.2  | 42.2  | 42.2  | 42.6  | 42.2  | 41.0  | 41.0  | 41.0  | 41.0  | 42.6  | 42.6  | 43.0  | 39.4  | 70.3  | 72.3  | 0.026 | 0.027 | 0.029 | 0.029 | 0.031 | 0.031 | 0.030 | 0.029 | 0.030 | 0.030 | 0.029 |       |
| 21        | NC_034499                          | Kaeng Khoi bat virus PSC-19         | 38.6  | 41.0  | 40.6  | 40.6  | 40.6  | 40.6  | 40.6  | 41.0  | 41.0  | 40.2  | 40.2  | 40.2  | 40.2  | 41.0  | 41.4  | 37.8  | 69.9  | 73.9  | 75.1  | 0.026 | 0.029 | 0.029 | 0.031 | 0.031 | 0.032 | 0.029 | 0.031 | 0.030 | 0.030 |       |       |
| 22        | NC_034479                          | Bwamba virus M459                   | 42.2  | 41.0  | 41.4  | 41.4  | 41.4  | 41.4  | 41.4  | 41.8  | 41.0  | 41.8  | 41.8  | 41.8  | 41.4  | 41.4  | 41.4  | 38.6  | 66.3  | 73.5  | 71.9  | 74.3  | 0.029 | 0.029 | 0.030 | 0.031 | 0.030 | 0.029 | 0.030 | 0.030 | 0.030 |       |       |
| 23        | KR017842                           | SFTSV_HN-LR/China/05/2012           | 47.0  | 43.0  | 43.0  | 43.0  | 43.0  | 43.0  | 43.0  | 43.4  | 43.4  | 42.2  | 42.2  | 42.2  | 42.2  | 43.0  | 43.0  | 41.8  | 43.0  | 37.3  | 38.2  | 41.0  | 40.2  | 39.8  | 0.004 | 0.029 | 0.028 | 0.029 | 0.000 | 0.030 | 0.028 | 0.029 |       |
| 24        | KU361343                           | SFTSV_ZL13-32                       | 46.6  | 43.4  | 43.4  | 43.4  | 43.4  | 43.4  | 43.8  | 43.8  | 42.6  | 42.6  | 42.6  | 42.6  | 43.4  | 43.4  | 41.8  | 42.6  | 37.8  | 38.2  | 41.4  | 40.2  | 39.8  | 99.6  | 0.028 | 0.028 | 0.029 | 0.004 | 0.030 | 0.028 | 0.029 |       |       |
| 25        | KF186494                           | Malsoor virus NIV1050639            | 45.8  | 48.6  | 48.6  | 48.6  | 48.6  | 48.2  | 48.2  | 49.0  | 48.6  | 48.6  | 48.6  | 48.6  | 48.6  | 48.6  | 43.4  | 44.2  | 39.4  | 39.0  | 44.2  | 42.2  | 39.4  | 67.1  | 67.5  | 0.007 | 0.030 | 0.029 | 0.030 | 0.028 | 0.029 |       |       |
| 26        | KF186497                           | Malsoor virus NIV1050650            | 46.2  | 48.2  | 48.2  | 48.2  | 48.2  | 47.8  | 47.8  | 48.6  | 48.2  | 48.2  | 48.2  | 48.2  | 48.2  | 43.0  | 44.6  | 39.8  | 39.0  | 44.6  | 42.6  | 39.8  | 67.9  | 68.3  | 98.8  | 0.030 | 0.028 | 0.030 | 0.028 | 0.029 |       |       |       |
| 27        | KM817665                           | Changping Tick virus 1/CP1/2        | 49.0  | 47.4  | 47.4  | 47.4  | 47.4  | 47.4  | 47.8  | 47.8  | 47.0  | 47.8  | 47.8  | 47.8  | 47.0  | 47.0  | 44.2  | 46.2  | 37.8  | 37.3  | 39.8  | 41.8  | 41.4  | 53.4  | 53.4  | 49.0  | 49.4  | 0.029 | 0.030 | 0.029 | 0.029 |       |       |
| 28        | JF906039                           | Huaiyangshan virus isolate XCQ-182L | 47.0  | 43.0  | 43.0  | 43.0  | 43.0  | 43.0  | 43.4  | 43.4  | 42.2  | 42.2  | 42.2  | 42.2  | 43.0  | 43.0  | 41.8  | 43.0  | 37.3  | 38.2  | 41.0  | 40.2  | 39.8  | 100.0 | 99.6  | 67.1  | 67.9  | 53.4  | 0.030 | 0.028 | 0.029 |       |       |
| 29        | NC_015374                          | Candiru virus                       | 49.0  | 54.2  | 54.2  | 54.2  | 54.2  | 53.8  | 54.6  | 54.6  | 54.2  | 54.2  | 54.2  | 54.2  | 53.8  | 53.8  | 52.2  | 48.2  | 43.0  | 43.8  | 44.6  | 45.4  | 46.2  | 50.2  | 50.2  | 50.6  | 51.0  | 60.2  | 50.2  | 0.029 | 0.030 |       |       |
| 30        | JQ287716                           | Mouyassue virus (hantavirus)        | 32.9  | 35.3  | 34.9  | 34.9  | 34.9  | 34.9  | 34.5  | 34.9  | 35.3  | 35.3  | 35.3  | 35.3  | 35.3  | 35.3  | 38.6  | 34.5  | 40.2  | 39.0  | 39.0  | 40.6  | 38.6  | 30.9  | 30.9  | 32.9  | 32.1  | 32.9  | 30.9  | 36.5  | 0.028 |       |       |
| 31        | KF704717                           | Xuan son virus F44601 (hantavirus)  | 37.3  | 37.3  | 37.3  | 37.3  | 37.3  | 37.3  | 36.9  | 37.3  | 36.5  | 36.5  | 36.5  | 36.5  | 36.5  | 37.8  | 37.8  | 37.8  | 36.1  | 40.2  | 43.0  | 40.2  | 47.8  | 41.0  | 30.1  | 30.1  | 30.5  | 30.9  | 34.5  | 30.1  | 36.5  | 69.9  |       |
