# Supplementary material for: A metagenomic viral discovery approach identifies potential zoonotic and novel mammalian viruses in Neoromicia bats within South Africa
Source: PubMed Central journal article supplement (PMC5868816; doi:10.1371/journal.pone.0194527), 2018-03-26
Supplement: pone.0194527.s009.pdf [file pone.0194527.s009.pdf]

S8 Table: Genome annotation of BtCoVNeo5038 with similarities to compared lineage C betacoronaviruses

| Genome description of BtCoVNeo5038                                      |                          |                    | Percentage identities to lineage C coronaviruses |      |                                     |      |                                |      |                                |      |                     |      |                   |      |                   |      |                        |      |  |
|-------------------------------------------------------------------------|--------------------------|--------------------|--------------------------------------------------|------|-------------------------------------|------|--------------------------------|------|--------------------------------|------|---------------------|------|-------------------|------|-------------------|------|------------------------|------|--|
| Open reading frames                                                     | Coding region position   | No. of amino acids | <i>Neoromicia</i> NeoCoV PML/PHE1                |      | <i>Pipistrellus</i> PREDICT-PDF2180 |      | <i>Tylonycteris</i> BtCoV-HKU4 |      | <i>Pipistrellus</i> BtCoV-HKU5 |      | Human MERS EMC 2012 |      | Human MERS Jeddah |      | Camel MERS Jeddah |      | Camel MERS NRCE HKU205 |      |  |
|                                                                         |                          |                    | nt%                                              | aa%  | nt%                                 | aa%  | nt%                            | aa%  | nt%                            | aa%  | nt%                 | aa%  | nt%               | aa%  | nt%               | aa%  | nt%                    | aa%  |  |
| <b>Nonstructural genes</b>                                              |                          |                    |                                                  |      |                                     |      |                                |      |                                |      |                     |      |                   |      |                   |      |                        |      |  |
| <b>ORF1a</b>                                                            | 268-13227                | 4319               | 96.9                                             | 98.1 | 85.4                                | 89.4 | 66.9                           | 64.5 | 66.9                           | 66.0 | 86.2                | 89.9 | 89.8              | 89.8 | 86.1              | 89.8 | 86.2                   | 89.8 |  |
| <b>ORF1ab</b>                                                           | 268..13440, 13440..21524 | 7085               | 97.2                                             | 98.6 | 87.3                                | 86.2 | 72.0                           | 73.4 | 72.0                           | 75.5 | 88.5                | 92.8 | 88.4              | 92.8 | 88.4              | 92.8 | 88.4                   | 92.7 |  |
| <b>Coronavirus structural genes</b>                                     |                          |                    |                                                  |      |                                     |      |                                |      |                                |      |                     |      |                   |      |                   |      |                        |      |  |
| <b>Spike</b>                                                            | 21466-25500              | 1344               | 96.0                                             | 98.7 | 85.5                                | 93.5 | 62.5                           | 60.2 | 61.8                           | 60.9 | 67.9                | 64.0 | 68.0              | 63.9 | 68.0              | 63.9 | 67.8                   | 63.7 |  |
| <b>Envelope</b>                                                         | 27573-27821              | 82                 | 98.0                                             | 98.8 | 91.2                                | 92.7 | 75.1                           | 74.4 | 76.3                           | 73.2 | 92.4                | 90.2 | 92.4              | 90.2 | 92.4              | 90.2 | 92.4                   | 90.2 |  |
| <b>Membrane</b>                                                         | 27836-28495              | 219                | 97.7                                             | 99.1 | 85.8                                | 94.5 | 74.9                           | 82.2 | 71.9                           | 82.2 | 87.9                | 94.5 | 87.7              | 94.1 | 87.7              | 94.1 | 87.9                   | 94.5 |  |
| <b>Nucleoprotein</b>                                                    | 28553-29797              | 414                | 98.3                                             | 99.5 | 87.4                                | 90.6 | 72.2                           | 75.4 | 72.6                           | 74.3 | 87.4                | 92.0 | 87.4              | 92.0 | 87.4              | 92.0 | 87.2                   | 91.5 |  |
| <b>Accessory proteins (hypothetical) of lineage C betacoronaviruses</b> |                          |                    |                                                  |      |                                     |      |                                |      |                                |      |                     |      |                   |      |                   |      |                        |      |  |
| <b>ORF3</b>                                                             | 25515-25826              | 103                | 97.8                                             | 97.3 | 76.5                                | 74.3 | 49.6                           | 30.1 | 57.5                           | 26.3 | 80.4                | 85.0 | 80.8              | 85.0 | 80.8              | 85.0 | 81.1                   | 84.5 |  |
| <b>ORF4a</b>                                                            | 25835-26164              | 109                | 98.2                                             | 99.1 | 78.2                                | 75.2 | 54.7                           | 38.9 | 54.0                           | 43.0 | 86.4                | 87.2 | 87.0              | 87.2 | 87.0              | 87.2 | 87.3                   | 87.2 |  |
| <b>ORF4b</b>                                                            | 26040-26816              | 258                | 97.2                                             | 97.3 | 72.7                                | 70.9 | 47.2                           | 30.1 | 45.7                           | 26.3 | 83.9                | 85.0 | 83.9              | 85.0 | 83.9              | 85.0 | 83.8                   | 84.5 |  |
| <b>ORF5</b>                                                             | 26823-27497              | 224                | 97.2                                             | 97.3 | 75.4                                | 73.7 | 59.3                           | 45.5 | 61.9                           | 56.3 | 84.8                | 88.4 | 84.7              | 88.4 | 84.7              | 88.4 | 84.1                   | 87.1 |  |
| <b>ORF8b</b>                                                            | 28599-29198              | 199                | 98.0                                             | 94.0 | 87.7                                | 72.4 | 74.5                           | 52.3 | 77.0                           | 53.2 | 92.6                | 82.1 | 92.9              | 82.1 | 92.9              | 82.1 | -                      | -    |  |
| <b>Overall genome</b>                                                   | 30009 bp                 | -                  | 97.2                                             | 98.5 | 86.2                                | 91.0 | 69.4                           | 69.4 | 69.5                           | 71   | 85.5                | 88.2 | 85.4              | 88.2 | 85.4              | 88.1 | 85.4                   | 88.1 |  |
