# Supplementary material for: A metagenomic viral discovery approach identifies potential zoonotic and novel mammalian viruses in Neoromicia bats within South Africa
Source: PubMed Central journal article supplement (PMC5868816; doi:10.1371/journal.pone.0194527), 2018-03-26
Supplement: pone.0194527.s010.pdf [file pone.0194527.s010.pdf]

S9 Table: Pairwise similarities inferred from distance estimations between betacoronavirus full genomes

| Accession | Coronaviruses as comparison | Lineage                                    | 1 | 2     | 3     | 4     | 5     | 6     | 7     | 8     | 9     | 10    | 11    | 12    | 13    | 14    | 15    | 16    | 17    | 18    | 19    | 20    | 21    | 22    | 23    | 24    | 25    | 26    | 27    | 28    |       |       |       |       |
|-----------|-----------------------------|--------------------------------------------|---|-------|-------|-------|-------|-------|-------|-------|-------|-------|-------|-------|-------|-------|-------|-------|-------|-------|-------|-------|-------|-------|-------|-------|-------|-------|-------|-------|-------|-------|-------|-------|
| 1         | NC00657                     | HCoV HKU1                                  |   | 0.002 | 0.002 | 0.002 | 0.003 | 0.003 | 0.003 | 0.003 | 0.003 | 0.003 | 0.003 | 0.003 | 0.003 | 0.002 | 0.002 | 0.002 | 0.002 | 0.002 | 0.002 | 0.002 | 0.002 | 0.002 | 0.002 | 0.003 | 0.002 | 0.003 | 0.003 | 0.003 | 0.003 |       |       |       |
| 2         | NC_003045                   | Bovine CoV                                 | A | 72.7  |       | 0.003 | 0.001 | 0.002 | 0.002 | 0.002 | 0.003 | 0.002 | 0.002 | 0.002 | 0.003 | 0.002 | 0.002 | 0.002 | 0.002 | 0.002 | 0.002 | 0.002 | 0.002 | 0.002 | 0.002 | 0.002 | 0.003 | 0.003 | 0.003 | 0.002 | 0.003 | 0.003 |       |       |
| 3         | NC_006852                   | MHV-JHM                                    |   | 72.0  | 72.3  |       | 0.003 | 0.002 | 0.002 | 0.002 | 0.002 | 0.002 | 0.002 | 0.003 | 0.002 | 0.003 | 0.003 | 0.003 | 0.003 | 0.003 | 0.003 | 0.003 | 0.003 | 0.003 | 0.003 | 0.003 | 0.003 | 0.002 | 0.003 | 0.003 | 0.003 | 0.003 |       |       |
| 4         | NC005147                    | HCoV OC43                                  |   | 72.6  | 96.6  | 72.5  |       | 0.002 | 0.002 | 0.002 | 0.002 | 0.003 | 0.002 | 0.002 | 0.003 | 0.002 | 0.003 | 0.003 | 0.003 | 0.003 | 0.003 | 0.003 | 0.003 | 0.003 | 0.003 | 0.003 | 0.003 | 0.003 | 0.002 | 0.003 | 0.003 | 0.003 |       |       |
| 5         | AY714217                    | HCoV SARS-CoV CDC                          |   | 45.7  | 45.2  | 44.1  | 45.2  |       | 0.000 | 0.000 | 0.002 | 0.001 | 0.002 | 0.001 | 0.002 | 0.003 | 0.002 | 0.002 | 0.002 | 0.002 | 0.002 | 0.002 | 0.002 | 0.002 | 0.002 | 0.002 | 0.002 | 0.002 | 0.002 | 0.003 | 0.002 | 0.002 |       |       |
| 6         | GU553365                    | HCoV SARS-CoV HKU39849                     |   | 45.6  | 45.1  | 43.9  | 45.1  | 100.0 |       | 0.000 | 0.002 | 0.001 | 0.002 | 0.001 | 0.002 | 0.003 | 0.002 | 0.002 | 0.002 | 0.002 | 0.002 | 0.002 | 0.002 | 0.002 | 0.002 | 0.002 | 0.002 | 0.002 | 0.002 | 0.003 | 0.002 | 0.003 |       |       |
| 7         | AY572034                    | Civet SARS-CoV 007                         |   | 45.6  | 45.1  | 43.9  | 45.1  | 99.7  | 99.7  |       | 0.002 | 0.001 | 0.002 | 0.001 | 0.002 | 0.003 | 0.002 | 0.002 | 0.002 | 0.002 | 0.002 | 0.002 | 0.002 | 0.002 | 0.002 | 0.002 | 0.002 | 0.002 | 0.002 | 0.003 | 0.002 | 0.002 |       |       |
| 8         | NC_009694                   | BtCoV <i>Rhinolophus</i> -SARS HKU3        | B | 45.5  | 44.8  | 44.0  | 44.9  | 87.8  | 87.9  | 87.7  |       | 0.002 | 0.002 | 0.001 | 0.002 | 0.002 | 0.002 | 0.002 | 0.002 | 0.002 | 0.002 | 0.002 | 0.002 | 0.002 | 0.002 | 0.002 | 0.002 | 0.002 | 0.003 | 0.002 | 0.003 | 0.003 |       |       |
| 9         | KF367457                    | BtCoV <i>Rhinolophus</i> -SARS WIV1        |   | 45.4  | 44.6  | 43.5  | 44.9  | 95.6  | 95.6  | 95.4  | 88.2  |       | 0.002 | 0.001 | 0.002 | 0.003 | 0.003 | 0.002 | 0.002 | 0.002 | 0.002 | 0.002 | 0.002 | 0.002 | 0.002 | 0.002 | 0.002 | 0.002 | 0.002 | 0.003 | 0.002 | 0.002 |       |       |
| 10        | DQ412043                    | BtCoV <i>Rhinolophus</i> -SARS Rm1         |   | 45.2  | 44.5  | 43.7  | 44.7  | 88.1  | 88.1  | 88.0  | 90.3  | 88.5  |       | 0.002 | 0.002 | 0.002 | 0.002 | 0.002 | 0.002 | 0.002 | 0.002 | 0.002 | 0.002 | 0.002 | 0.002 | 0.002 | 0.002 | 0.002 | 0.002 | 0.003 | 0.002 | 0.003 |       |       |
| 11        | DQ071615                    | BtCoV <i>Rhinolophus</i> -SARS Rp3         |   | 45.6  | 45.0  | 44.0  | 45.0  | 92.5  | 92.6  | 92.4  | 89.7  | 93.5  | 90.5  |       | 0.003 | 0.002 | 0.002 | 0.002 | 0.002 | 0.002 | 0.002 | 0.002 | 0.002 | 0.002 | 0.002 | 0.002 | 0.002 | 0.002 | 0.002 | 0.002 | 0.002 | 0.002 |       |       |
| 12        | NC_009021                   | BtCoV <i>Rousettus</i> /HKU9-1             | D | 46.2  | 45.4  | 44.0  | 45.4  | 51.8  | 51.8  | 51.8  | 51.5  | 51.6  | 51.5  | 51.7  |       | 0.002 | 0.002 | 0.003 | 0.003 | 0.003 | 0.003 | 0.003 | 0.003 | 0.003 | 0.003 | 0.003 | 0.003 | 0.003 | 0.003 | 0.002 | 0.003 | 0.002 |       |       |
| 13        | EF065516                    | BtCoV <i>Rousettus</i> /HKU9-4             |   | 45.8  | 44.9  | 43.8  | 44.9  | 51.6  | 51.5  | 51.5  | 51.1  | 51.3  | 50.9  | 51.3  | 79.6  |       | 0.003 | 0.003 | 0.003 | 0.003 | 0.003 | 0.003 | 0.003 | 0.003 | 0.003 | 0.003 | 0.003 | 0.003 | 0.003 | 0.003 | 0.003 | 0.003 | 0.002 |       |
| 14        | NC_022643                   | <i>Erinaceus</i> CoV VMC/DEU/2012          |   | 47.4  | 46.4  | 44.9  | 46.4  | 49.2  | 49.1  | 49.2  | 49.1  | 49.1  | 49.1  | 49.2  | 47.7  | 47.7  |       | 0.003 | 0.002 | 0.002 | 0.002 | 0.002 | 0.002 | 0.002 | 0.002 | 0.002 | 0.003 | 0.002 | 0.003 | 0.002 | 0.002 | 0.002 | 0.002 |       |
| 15        | KC164505                    | HCoV MERS/England1                         |   | 46.1  | 45.5  | 44.4  | 45.6  | 49.5  | 49.3  | 49.4  | 49.3  | 49.3  | 49.1  | 49.4  | 47.6  | 47.3  | 69.3  |       | 0.000 | 0.000 | 0.000 | 0.000 | 0.000 | 0.000 | 0.000 | 0.000 | 0.000 | 0.000 | 0.000 | 0.000 | 0.000 | 0.001 | 0.002 |       |
| 16        | KM210277                    | HCoV MERS/England/4/2013                   |   | 46.1  | 45.6  | 44.4  | 45.6  | 49.5  | 49.3  | 49.4  | 49.2  | 49.2  | 49.1  | 49.4  | 47.6  | 47.3  | 69.3  | 99.8  |       | 0.000 | 0.000 | 0.000 | 0.000 | 0.000 | 0.000 | 0.000 | 0.000 | 0.000 | 0.000 | 0.000 | 0.003 | 0.002 | 0.002 | 0.001 |
| 17        | KU308549                    | HCoV MERS/Korea/Seoul/SNU/103              |   | 46.1  | 45.5  | 44.4  | 45.6  | 49.4  | 49.3  | 49.4  | 49.2  | 49.3  | 49.1  | 49.4  | 47.6  | 47.3  | 69.3  | 99.8  | 99.7  |       | 0.000 | 0.000 | 0.000 | 0.000 | 0.000 | 0.000 | 0.000 | 0.000 | 0.003 | 0.002 | 0.002 | 0.001 | 0.002 |       |
| 18        | KF958702                    | HCoV MERS/Jeddah/human/1                   |   | 46.2  | 45.6  | 44.4  | 45.7  | 49.5  | 49.4  | 49.4  | 49.3  | 49.4  | 49.2  | 49.5  | 47.7  | 47.4  | 69.2  | 99.9  | 99.8  | 99.7  |       | 0.000 | 0.000 | 0.000 | 0.000 | 0.000 | 0.000 | 0.000 | 0.003 | 0.002 | 0.002 | 0.001 | 0.002 |       |
| 19        | KF917527                    | HCoV MERS/Jeddah/Camel/1                   |   | 46.2  | 45.6  | 44.4  | 45.7  | 49.5  | 49.4  | 49.4  | 49.3  | 49.4  | 49.2  | 49.5  | 47.7  | 47.4  | 69.2  | 99.9  | 99.8  | 99.7  | 100.0 |       | 0.000 | 0.000 | 0.000 | 0.000 | 0.000 | 0.003 | 0.002 | 0.002 | 0.001 | 0.002 |       |       |
| 20        | KJ713299                    | HCoV MERS/KSA/CAMEL/376                    |   | 46.1  | 45.6  | 44.4  | 45.6  | 49.5  | 49.3  | 49.4  | 49.3  | 49.3  | 49.1  | 49.4  | 47.6  | 47.3  | 69.3  | 99.8  | 99.9  | 99.7  | 99.8  | 99.8  |       | 0.000 | 0.000 | 0.000 | 0.000 | 0.003 | 0.002 | 0.002 | 0.001 | 0.002 |       |       |
| 21        | KJ713298                    | HCoV MERS/KSA/CAMEL/363                    |   | 46.1  | 45.6  | 44.4  | 45.6  | 49.5  | 49.3  | 49.4  | 49.2  | 49.2  | 49.1  | 49.4  | 47.6  | 47.3  | 69.3  | 99.9  | 99.8  | 99.7  | 99.8  | 99.8  | 99.8  |       | 0.000 | 0.000 | 0.000 | 0.003 | 0.002 | 0.002 | 0.001 | 0.002 |       |       |
| 22        | KJ713297                    | HCoV MERS/KSA/CAMEL/503                    |   | 46.1  | 45.6  | 44.4  | 45.6  | 49.5  | 49.3  | 49.4  | 49.2  | 49.2  | 49.1  | 49.4  | 47.6  | 47.3  | 69.3  | 99.8  | 99.8  | 99.7  | 99.8  | 99.8  | 99.8  | 99.9  |       | 0.000 | 0.003 | 0.002 | 0.002 | 0.001 | 0.002 |       |       |       |
| 23        | KJ477102                    | HCoV MERS/CAMEL/NRCE-HKU20                 | C | 46.1  | 45.5  | 44.4  | 45.6  | 49.5  | 49.4  | 49.4  | 49.2  | 49.3  | 49.0  | 49.4  | 47.6  | 47.3  | 69.2  | 99.5  | 99.5  | 99.3  | 99.4  | 99.4  | 99.4  | 99.5  | 99.4  |       | 0.003 | 0.002 | 0.002 | 0.001 | 0.001 |       |       |       |
| 24        | NC009020                    | BatCoV <i>Pipistrellus</i> /HKU5           |   | 45.1  | 44.3  | 43.8  | 44.4  | 48.4  | 48.3  | 48.3  | 48.2  | 48.1  | 48.0  | 48.3  | 46.9  | 46.6  | 66.1  | 70.1  | 70.0  | 70.1  | 69.8  | 69.8  | 70.0  | 70.0  | 70.0  | 69.9  |       | 0.003 | 0.002 | 0.002 | 0.003 |       |       |       |
| 25        | NC009019                    | BatCoV <i>Tyonycteris</i> /HKU4            |   | 47.4  | 46.3  | 44.7  | 46.3  | 49.6  | 49.4  | 49.5  | 49.2  | 49.3  | 49.1  | 49.6  | 48.2  | 47.5  | 67.1  | 69.7  | 69.6  | 69.7  | 69.5  | 69.5  | 69.7  | 69.7  | 69.7  | 69.5  | 72.9  |       | 0.002 | 0.003 | 0.003 |       |       |       |
| 26        | KX574227                    | BtCoV <i>Pipistrellus</i> /PREDICT-PDF2180 |   | 46.9  | 45.8  | 45.0  | 45.8  | 49.4  | 49.4  | 49.4  | 49.2  | 49.2  | 49.2  | 49.4  | 48.0  | 47.5  | 70.0  | 83.4  | 83.4  | 83.4  | 83.4  | 83.4  | 83.4  | 83.4  | 83.4  | 83.4  | 83.3  | 69.7  | 69.3  |       | 0.001 | 0.001 |       |       |
| 27        | KC869678                    | BtCoV <i>Neoromicia</i> /PML/RSA/2011      |   | 46.9  | 45.8  | 44.8  | 45.9  | 49.5  | 49.4  | 49.4  | 49.3  | 49.2  | 49.1  | 49.4  | 48.2  | 47.8  | 70.0  | 85.6  | 85.5  | 85.5  | 85.4  | 85.4  | 85.5  | 85.5  | 85.6  | 85.4  | 69.7  | 69.4  | 86.2  |       | 0.001 |       |       |       |
| 28        | this study                  | BtCoV <i>Neoromicia</i> 5038/KZN/RSA/2015  |   | 47.0  | 45.8  | 44.8  | 45.9  | 49.5  | 49.4  | 49.4  | 49.3  | 49.2  | 49.1  | 49.4  | 48.3  | 47.9  | 70.1  | 85.5  | 85.5  | 85.5  | 85.4  | 85.4  | 85.5  | 85.5  | 85.5  | 85.4  | 69.5  | 69.4  | 86.3  | 97.2  |       |       |       |       |
