# Supplementary material for: A metagenomic viral discovery approach identifies potential zoonotic and novel mammalian viruses in Neoromicia bats within South Africa
Source: PubMed Central journal article supplement (PMC5868816; doi:10.1371/journal.pone.0194527), 2018-03-26
Supplement: pone.0194527.s011.pdf [file pone.0194527.s011.pdf]

**S10 Table: Coronavirus strains and Genbank accession numbers of sequences used in the full genome phylogeny.**

| <b>Coronavirus</b>                               | <b>Abbreviation used</b> | <b>Genbank accession number</b> |
|--------------------------------------------------|--------------------------|---------------------------------|
| Human coronavirus OC43                           | HCoVOC43                 | NC005147                        |
| Bovine coronavirus                               | BovineCoV                | NC_003045                       |
| Human coronavirus HKU1                           | HCoVHKU1                 | NC006577                        |
| Murine hepatitis virus strain JHM                | MHV                      | NC_006852                       |
| Human SARS coronavirus CDC200301157              | HCoVSARS                 | AY714217                        |
| Civet SARS coronavirus 007                       | HCoVcivet                | AY572034                        |
| Human SARS coronavirus                           | HKU-39849                | GU553365                        |
| <i>Rhinolophus</i> SARS-related coronavirus Rp3  | Rp3                      | DQ071615                        |
| <i>Rhinolophus</i> SARS-related coronavirus Rm1  | Rm1                      | DQ412043                        |
| <i>Rhinolophus</i> SARS-related coronavirus HKU3 | HKU3                     | NC_009694                       |
| <i>Rhinolophus</i> SARS-related coronavirus WIV1 | WIV1                     | KF367457                        |
| Rousettus coronavirus HKU9-1                     | HKU9                     | NC_009021                       |
| Rousettus coronavirus HKU9-4                     | HKU9                     | EF065516                        |
| Erinaceus CoV/2012-216/GER/2012                  | Erinaceus2012            | NC_022643                       |
| Human MERS strain England 1                      | HCoVMEERS                | KC164505                        |
| Human MERS strain England/4/2013                 | HCoVMEERS                | KM210277                        |
| Human MERS strain Korea/Seoul/SNU1-035/2015      | HCoVMEERS                | KU308549                        |
| Human MERS strain Jeddah-human-1                 | HCoVMEERS                | KF958702                        |
| MERS camel strain Jeddah-camel-1                 | Camel MERS               | KF917527                        |
| MERS camel strain 376                            | Camel MERS               | KJ713299                        |
| MERS camel strain 363                            | Camel MERS               | KJ713298                        |
| MERS camel strain 503                            | Camel MERS               | KJ713297                        |
| MERS camel strain NRCE-HKU205                    | Camel MERS               | KJ477102                        |
| Neoromicia/PML-PHE1/RSA/2011                     | NeoCoV PML-PHE1          | KC869678                        |
| Neoromicia bat coronavirus 5038/KZN/RSA/2015     | BtCoVNeo5038             | MF593268                        |
| <i>Pipistrellus</i> bat coronavirus HKU5         | HKU5                     | NC009020                        |
| <i>Tylonycteris</i> bat coronavirus HKU4         | HKU4                     | NC009019                        |
