# Supplementary material for: A metagenomic viral discovery approach identifies potential zoonotic and novel mammalian viruses in Neoromicia bats within South Africa
Source: PLoS One. 2018 Mar 26;13(3):e0194527. doi: 10.1371/journal.pone.0194527 (PMC5868816; doi:10.1371/journal.pone.0194527)
Supplement: S7 Table — The table shows pairwise sequence similarities inferred from evolutionary divergence estimates of 605 positions of compared coronaviruses. The number of base differences per site from between sequences were converted to percentage of similarities. The sequences from this study are highlighted in grey and closest similarities to sequences from other studies are indicated in bold. Standard errors for distance estimates are shown above the diagonal in grey text. Codon positions included were 1–3 as well as noncoding and ambiguous positions were removed for each sequence pair as per pairwise deletion. Estimates were analysed in MEGA 7 [41]. (PDF) [file pone.0194527.s008.pdf]

S7 Table: Pairwise similarities inferred from distance estimations of a 605bp conserved segment of the coronavirus RNA dependent RNA polymerase gene

| Accession    | Coronaviruses as comparison         | 1     | 2     | 3     | 4     | 5     | 6     | 7     | 8     | 9     | 10    | 11    | 12    | 13    | 14    | 15    | 16    | 17    | 18     | 19    | 20    | 21    | 22    | 23    | 24    | 25    | 26    | 27    | 28    | 29    | 30    | 31    | 32    | 33    | 34    | 35    | 36    | 37    | 38    | 39    | 40    | Genera |       |       |       |       |       |       |       |
|--------------|-------------------------------------|-------|-------|-------|-------|-------|-------|-------|-------|-------|-------|-------|-------|-------|-------|-------|-------|-------|--------|-------|-------|-------|-------|-------|-------|-------|-------|-------|-------|-------|-------|-------|-------|-------|-------|-------|-------|-------|-------|-------|-------|--------|-------|-------|-------|-------|-------|-------|-------|
| 1 NC_005831  | HCovNl63                            |       | 0.018 | 0.017 | 0.018 | 0.018 | 0.016 | 0.015 | 0.016 | 0.017 | 0.017 | 0.018 | 0.017 | 0.016 | 0.017 | 0.017 | 0.016 | 0.017 | 0.017  | 0.017 | 0.017 | 0.018 | 0.019 | 0.019 | 0.019 | 0.019 | 0.019 | 0.019 | 0.019 | 0.020 | 0.019 | 0.020 | 0.020 | 0.020 | 0.020 | 0.020 | 0.019 | 0.019 | 0.019 | 0.019 | 0.019 |        |       |       |       |       |       |       |       |
| 2 NC_002645  | HCovV229E                           | 73.72 |       | 0.013 | 0.010 | 0.010 | 0.017 | 0.017 | 0.018 | 0.017 | 0.018 | 0.017 | 0.018 | 0.017 | 0.017 | 0.017 | 0.018 | 0.018 | 0.018  | 0.018 | 0.017 | 0.019 | 0.019 | 0.020 | 0.020 | 0.020 | 0.020 | 0.020 | 0.020 | 0.020 | 0.020 | 0.020 | 0.020 | 0.020 | 0.020 | 0.020 | 0.020 | 0.020 | 0.020 | 0.020 | 0.020 | 0.019  | 0.019 | 0.020 | 0.020 | 0.019 |       |       |       |
| 3 FJ710045   | BiCoV/Hipposideros/GhanaKwam/8/2008 | 77.52 | 87.44 |       | 0.012 | 0.012 | 0.017 | 0.017 | 0.017 | 0.017 | 0.017 | 0.018 | 0.017 | 0.018 | 0.017 | 0.018 | 0.017 | 0.018 | 0.018  | 0.018 | 0.018 | 0.017 | 0.019 | 0.019 | 0.020 | 0.020 | 0.020 | 0.020 | 0.020 | 0.020 | 0.020 | 0.020 | 0.020 | 0.020 | 0.020 | 0.020 | 0.020 | 0.020 | 0.020 | 0.020 | 0.020 | 0.020  | 0.020 | 0.019 | 0.019 | 0.020 | 0.020 | 0.019 |       |
| 4 KY073747   | BiCoV/Hipposideros/KY229E-1         | 73.72 | 92.40 | 89.42 |       | 0.009 | 0.017 | 0.017 | 0.017 | 0.017 | 0.017 | 0.018 | 0.016 | 0.016 | 0.017 | 0.018 | 0.019 | 0.018 | 0.018  | 0.018 | 0.017 | 0.019 | 0.019 | 0.020 | 0.020 | 0.020 | 0.020 | 0.020 | 0.020 | 0.020 | 0.020 | 0.020 | 0.020 | 0.020 | 0.020 | 0.020 | 0.020 | 0.020 | 0.020 | 0.020 | 0.020 | 0.020  | 0.020 | 0.020 | 0.020 | 0.019 |       |       |       |
| 5 KY073748   | BiCoV/Hipposideros/KY229E-8         | 73.88 | 92.56 | 90.25 | 94.21 |       | 0.017 | 0.017 | 0.018 | 0.018 | 0.017 | 0.018 | 0.017 | 0.017 | 0.017 | 0.018 | 0.018 | 0.018 | 0.018  | 0.018 | 0.018 | 0.019 | 0.019 | 0.019 | 0.019 | 0.019 | 0.020 | 0.020 | 0.020 | 0.020 | 0.020 | 0.020 | 0.020 | 0.020 | 0.020 | 0.020 | 0.020 | 0.020 | 0.020 | 0.020 | 0.020 | 0.020  | 0.020 | 0.020 | 0.020 | 0.020 | 0.020 | 0.020 |       |
| 6 This study | BiCoV/Neoromicia 1787/LP/ISA/2013   | 79.17 | 72.07 | 72.89 | 72.23 | 73.06 |       | 0.017 | 0.017 | 0.017 | 0.017 | 0.017 | 0.013 | 0.016 | 0.016 | 0.016 | 0.016 | 0.015 | 0.016  | 0.016 | 0.015 | 0.017 | 0.019 | 0.018 | 0.019 | 0.019 | 0.019 | 0.019 | 0.019 | 0.019 | 0.019 | 0.019 | 0.019 | 0.019 | 0.019 | 0.019 | 0.019 | 0.019 | 0.019 | 0.019 | 0.019 | 0.019  | 0.019 | 0.019 | 0.019 | 0.019 | 0.018 | 0.018 |       |
| 7 NC_032107  | BiCoV/Triaenops afer/KYNL63-9a      | 84.63 | 74.71 | 75.37 | 74.88 | 75.37 | 77.69 |       | 0.016 | 0.016 | 0.018 | 0.018 | 0.016 | 0.017 | 0.017 | 0.016 | 0.017 | 0.017 | 0.017  | 0.017 | 0.016 | 0.017 | 0.019 | 0.019 | 0.019 | 0.019 | 0.019 | 0.019 | 0.019 | 0.020 | 0.019 | 0.020 | 0.020 | 0.020 | 0.020 | 0.020 | 0.020 | 0.020 | 0.020 | 0.020 | 0.020 | 0.020  | 0.020 | 0.020 | 0.020 | 0.020 | 0.020 | 0.020 |       |
| 8 KY073745   | BiCoV/Triaenops afer/KYNL63-9b      | 76.20 | 71.57 | 74.05 | 72.56 | 72.40 | 73.88 | 79.17 |       | 0.004 | 0.018 | 0.018 | 0.017 | 0.017 | 0.017 | 0.017 | 0.017 | 0.018 | 0.017  | 0.017 | 0.018 | 0.017 | 0.019 | 0.019 | 0.019 | 0.019 | 0.019 | 0.019 | 0.020 | 0.019 | 0.019 | 0.019 | 0.019 | 0.019 | 0.019 | 0.019 | 0.019 | 0.019 | 0.019 | 0.019 | 0.019 | 0.019  | 0.019 | 0.019 | 0.019 | 0.019 | 0.020 | 0.020 |       |
| 9 KY073746   | BiCoV/Triaenops afer/KYNL63-15      | 76.36 | 71.90 | 74.21 | 72.23 | 72.56 | 73.55 | 79.01 | 99.01 |       | 0.018 | 0.017 | 0.017 | 0.017 | 0.017 | 0.017 | 0.017 | 0.018 | 0.017  | 0.017 | 0.017 | 0.017 | 0.019 | 0.019 | 0.019 | 0.019 | 0.019 | 0.019 | 0.020 | 0.020 | 0.019 | 0.019 | 0.019 | 0.019 | 0.019 | 0.019 | 0.019 | 0.019 | 0.019 | 0.019 | 0.019 | 0.019  | 0.019 | 0.019 | 0.020 | 0.020 |       |       |       |
| 10 NC_003436 | PEdV (Porcine)                      | 73.22 | 70.58 | 70.74 | 70.74 | 71.07 | 74.05 | 71.24 | 73.72 | 74.55 |       | 0.019 | 0.018 | 0.018 | 0.018 | 0.017 | 0.018 | 0.018 | 0.016  | 0.016 | 0.018 | 0.018 | 0.019 | 0.019 | 0.019 | 0.019 | 0.019 | 0.019 | 0.019 | 0.020 | 0.020 | 0.020 | 0.020 | 0.020 | 0.020 | 0.020 | 0.020 | 0.020 | 0.020 | 0.020 | 0.020 | 0.020  | 0.020 | 0.020 | 0.020 | 0.020 | 0.020 | 0.020 |       |
| 11 NC_002306 | FIPV (Feline)                       | 70.91 | 70.74 | 71.90 | 70.25 | 70.91 | 72.23 | 71.07 | 70.41 | 70.58 | 66.61 |       | 0.017 | 0.019 | 0.019 | 0.018 | 0.019 | 0.017 | 0.017  | 0.017 | 0.017 | 0.017 | 0.018 | 0.019 | 0.019 | 0.019 | 0.019 | 0.018 | 0.018 | 0.018 | 0.019 | 0.019 | 0.019 | 0.019 | 0.019 | 0.019 | 0.019 | 0.019 | 0.019 | 0.019 | 0.019 | 0.019  | 0.019 | 0.019 | 0.019 | 0.019 | 0.019 | 0.019 |       |
| 12 GU190239  | BiCoV/Nyctalus/BNM98-30/BGR/2008    | 75.54 | 71.74 | 72.23 | 72.23 | 73.22 | 85.79 | 75.87 | 74.88 | 74.38 | 73.39 | 70.74 |       | 0.016 | 0.016 | 0.016 | 0.017 | 0.015 | 0.016  | 0.016 | 0.015 | 0.018 | 0.018 | 0.018 | 0.020 | 0.020 | 0.020 | 0.020 | 0.019 | 0.019 | 0.019 | 0.019 | 0.019 | 0.019 | 0.019 | 0.019 | 0.019 | 0.019 | 0.019 | 0.019 | 0.019 | 0.019  | 0.019 | 0.019 | 0.019 | 0.019 | 0.019 | 0.019 | 0.019 |
| 13 GU190247  | BiCoV/Miniopterus/BR98-52/BGR/2008  | 77.52 | 74.38 | 74.21 | 74.38 | 73.55 | 79.01 | 75.54 | 75.21 | 75.70 | 72.40 | 70.58 | 77.52 |       | 0.004 | 0.015 | 0.010 | 0.016 | 0.017  | 0.017 | 0.016 | 0.017 | 0.018 | 0.018 | 0.019 | 0.019 | 0.019 | 0.019 | 0.019 | 0.020 | 0.020 | 0.020 | 0.020 | 0.020 | 0.020 | 0.020 | 0.020 | 0.020 | 0.020 | 0.020 | 0.020 | 0.020  | 0.020 | 0.020 | 0.020 | 0.020 | 0.020 | 0.020 |       |
| 14 GU190241  | BiCoV/Miniopterus/BR98-14/BGR/2008  | 76.86 | 73.88 | 74.05 | 73.88 | 73.39 | 79.01 | 75.54 | 74.55 | 75.04 | 72.40 | 70.58 | 77.36 | 99.01 |       | 0.015 | 0.010 | 0.015 | 0.017  | 0.017 | 0.015 | 0.017 | 0.018 | 0.018 | 0.019 | 0.019 | 0.019 | 0.019 | 0.019 | 0.019 | 0.020 | 0.019 | 0.019 | 0.019 | 0.019 | 0.019 | 0.019 | 0.019 | 0.019 | 0.019 | 0.019 | 0.019  | 0.019 | 0.019 | 0.019 | 0.019 | 0.019 | 0.019 |       |
| 15 NC_010437 | BiCoV/Miniopterus/11A               | 75.37 | 72.56 | 73.22 | 74.05 | 74.38 | 79.01 | 76.69 | 74.38 | 74.05 | 74.21 | 71.57 | 77.02 | 80.00 | 79.83 |       | 0.016 | 0.016 | 0.016  | 0.016 | 0.016 | 0.016 | 0.019 | 0.018 | 0.019 | 0.020 | 0.019 | 0.019 | 0.019 | 0.019 | 0.019 | 0.020 | 0.020 | 0.020 | 0.020 | 0.020 | 0.020 | 0.020 | 0.020 | 0.020 | 0.020 | 0.020  | 0.020 | 0.020 | 0.020 | 0.020 | 0.020 | 0.020 |       |
| 16 NC_010438 | BiCoV/Miniopterus/1HKU8             | 77.85 | 74.21 | 73.55 | 74.38 | 73.22 | 77.19 | 75.21 | 76.03 | 75.87 | 73.39 | 71.24 | 75.87 | 93.72 | 93.39 | 80.17 |       | 0.016 | 0.017  | 0.017 | 0.016 | 0.017 | 0.019 | 0.019 | 0.019 | 0.020 | 0.020 | 0.020 | 0.019 | 0.019 | 0.019 | 0.019 | 0.019 | 0.019 | 0.019 | 0.019 | 0.019 | 0.019 | 0.019 | 0.019 | 0.019 | 0.019  | 0.019 | 0.019 | 0.019 | 0.019 | 0.019 | 0.019 | 0.019 |
| 17 DQ249226  | BiCoV/HKU7-1                        | 74.71 | 71.40 | 72.40 | 72.40 | 73.39 | 78.51 | 74.38 | 74.55 | 74.55 | 73.88 | 73.22 | 79.50 | 80.17 | 80.17 | 80.83 | 80.50 |       | 0.016  | 0.016 | 0.005 | 0.017 | 0.019 | 0.018 | 0.019 | 0.019 | 0.019 | 0.018 | 0.018 | 0.019 | 0.019 | 0.019 | 0.019 | 0.019 | 0.019 | 0.019 | 0.019 | 0.019 | 0.019 | 0.019 | 0.019 | 0.019  | 0.019 | 0.019 | 0.019 | 0.019 | 0.019 | 0.019 | 0.019 |
| 18 KF294377  | BiCoV/Murina/Neixiang-14            | 74.38 | 71.24 | 71.74 | 70.74 | 72.23 | 78.18 | 76.36 | 72.73 | 72.89 | 76.69 | 70.91 | 75.54 | 75.04 | 75.21 | 76.53 | 75.37 | 75.87 |        | 0.000 | 0.016 | 0.016 | 0.019 | 0.018 | 0.018 | 0.018 | 0.018 | 0.019 | 0.019 | 0.019 | 0.019 | 0.019 | 0.019 | 0.019 | 0.019 | 0.019 | 0.019 | 0.019 | 0.019 | 0.019 | 0.019 | 0.019  | 0.019 | 0.019 | 0.019 | 0.019 | 0.019 | 0.019 | 0.019 |
| 19 KF294376  | BiCoV/Murina/Neixiang-27            | 74.38 | 71.24 | 71.74 | 70.74 | 72.23 | 78.18 | 76.36 | 72.73 | 72.89 | 76.69 | 70.91 | 75.54 | 75.04 | 75.21 | 76.53 | 75.37 | 75.87 | 100.00 |       | 0.016 | 0.016 | 0.019 | 0.018 | 0.018 | 0.018 | 0.018 | 0.019 | 0.019 | 0.019 | 0.019 | 0.019 | 0.019 | 0.019 | 0.019 | 0.019 | 0.019 | 0.019 | 0.019 | 0.019 | 0.019 | 0.019  | 0.019 | 0.019 | 0.019 | 0.019 | 0.019 | 0.019 | 0.019 |
| 20 KF294271  | BiCoV/Miniopterus/lanlong-36        | 74.38 | 71.07 | 72.23 | 71.74 | 73.06 | 79.34 | 74.71 | 74.55 | 74.55 | 73.06 | 74.05 | 80.17 | 80.33 | 80.66 | 81.16 | 80.66 | 98.18 | 75.70  | 75.70 |       | 0.017 | 0.019 | 0.018 | 0.019 | 0.019 | 0.019 | 0.018 | 0.018 | 0.019 | 0.019 | 0.019 | 0.019 | 0.019 | 0.019 | 0.019 | 0.019 | 0.019 | 0.019 | 0.019 | 0.019 | 0.019  | 0.019 | 0.019 | 0.019 | 0.019 | 0.019 | 0.019 | 0.019 |
| 21 NC_009988 | BiCoV/Rhinolophus/1HKU2             | 73.39 | 71.57 | 73.39 | 72.56 | 72.73 | 73.72 | 72.89 | 74.55 | 74.38 | 70.08 | 72.73 | 73.06 | 76.20 | 76.53 | 76.36 | 75.54 | 75.37 | 75.04  | 75.04 | 75.37 |       | 0.019 | 0.018 | 0.019 | 0.019 | 0.018 | 0.019 | 0.019 | 0.019 | 0.019 | 0.019 | 0.019 | 0.019 | 0.019 | 0.019 | 0.019 | 0.019 | 0.019 | 0.019 | 0.019 | 0.019  | 0.019 | 0.019 | 0.019 | 0.019 | 0.019 | 0.019 | 0.019 |
| 22 NC_006577 | BiCoV/HKU1                          | 63.47 | 63.64 | 65.62 | 62.81 | 64.46 | 63.80 | 62.98 | 59.67 | 59.67 | 58.35 | 64.79 | 62.81 | 63.80 | 63.97 | 63.14 | 62.31 | 63.31 | 64.63  | 64.63 | 62.64 | 62.81 |       | 0.013 | 0.018 | 0.018 | 0.018 | 0.018 | 0.018 | 0.018 | 0.018 | 0.018 | 0.018 | 0.018 | 0.018 | 0.018 | 0.018 | 0.018 | 0.018 | 0.018 | 0.018 | 0.018  | 0.018 | 0.018 | 0.018 | 0.018 | 0.018 | 0.018 | 0.018 |
| 23 NC_005147 | HCovVOC43                           | 62.98 | 63.31 | 63.64 | 62.31 | 63.80 | 60.66 | 63.47 | 60.83 | 60.50 | 57.36 | 61.32 | 60.33 | 63.14 | 62.98 | 60.50 | 62.48 | 62.98 | 62.64  | 62.64 | 62.15 | 62.15 |       | 85.12 |       | 0.018 | 0.018 | 0.018 | 0.018 | 0.018 | 0.018 | 0.018 | 0.018 | 0.018 | 0.018 | 0.018 | 0.018 | 0.018 | 0.018 | 0.018 | 0.018 | 0.018  | 0.018 | 0.018 | 0.018 | 0.018 | 0.018 | 0.018 | 0.018 |
| 24 NC_004718 | HCov/SARS                           | 61.32 | 61.16 | 62.81 | 61.49 | 62.31 | 62.15 | 62.31 | 61.16 | 61.16 | 61.98 | 60.17 | 61.82 | 62.31 | 61.98 | 63.80 | 61.65 | 63.14 | 64.46  | 64.46 | 62.31 | 63.97 |       | 66.61 | 66.28 |       | 0.005 | 0.004 | 0.019 | 0.018 | 0.018 | 0.018 | 0.019 | 0.019 | 0.019 | 0.019 | 0.019 | 0.019 | 0.019 | 0.019 | 0.019 | 0.019  | 0.019 | 0.019 | 0.019 | 0.019 | 0.019 | 0.020 |       |
| 25 DQ071615  | BiCoV/Rhinolophus/SARS-related Rp3  | 60.83 | 60.83 | 62.   |       |       |       |       |       |       |       |       |       |       |       |       |       |       |        |       |       |       |       |       |       |       |       |       |       |       |       |       |       |       |       |       |       |       |       |       |       |        |       |       |       |       |       |       |       |
